# Supplementary material for: The long-run effects of secondary school track assignment
Source: PLoS One. 2019 Oct 25;14(10):e0215493. doi: 10.1371/journal.pone.0215493 (PMC6814234; doi:10.1371/journal.pone.0215493)
Supplement: S1 Data — Stata do-files containing all data coding and model specifications. (DO) [file pone.0215493.s018.do]

**This do-file documents all the data coding and analysis for "The long-run effects of secondary school track assignment", Borghans, Diris, Smits and De Vries (2019)
**The main source file consists of a merger between four educational data sets (SMVO 1977, SLVO 1982, VOCL 1989 and VOCL 1993) on the one hand with SSB labour market information on the other.
**The merged file is titled cohort77_93_ssb_v2_versl.dta
**Additional analysis for school achievement are conducted on a separate educational dataset (VOCL 1999)
**All these files can be requested from Statistics Netherlands via https://www.cbs.nl/en-gb/our-services/customised-services-microdata/microdata-conducting-your-own-research

**The do-file below consists of 4 parts
** 1. Coding of main (merged) data file
** 2. Regression analysis on main data file for results presented in the main paper
** 3. Regression analysis on main data file for results presented in the supporting information figures and tables
** 4. Coding and regression analysis for the additional VOCL 1999 file (school achievement results)

**For any questions, feel free to contact me at r.diris@maastrichtuniversity.nl

**PART 1: Coding of main (merged) data file

use "cohort77_93_ssb_v2_versl.dta", clear

//construct total score for test from subscores for 1977 cohort
gen entrtot77 = cstaal99+csrek99 if cohort ==1977
replace entrtot = entrtot77 if cohort==1977
drop if entrtot==.

//what is labeled as cohort 1982 is actually administered in 1983
replace cohort=1983 if cohort==1982

//wage variables (loon=wage)
gen loon2007 =  mndloonpers_20070928v1
gen loon2006 =  mndloonpers_20060929v1
gen loon2005 =  mndloonpers_20050930v1
gen loon2004 =  mndloonpers_20040924v1
gen loon2003 =  mndloonpers_20030926v1
gen loon2002 =  mndloonpers_20020927v1
gen loon2001 =  mndloonpers_20010928v1
gen loon2000 =  mndloonpers_20000929v1
gen loon1999 =  mndloonpers_19990924v1

//log of wages
gen log_loon2007 = log(loon2007)
gen log_loon2006 = log(loon2006)
gen log_loon2005 = log(loon2005)
gen log_loon2004 = log(loon2004)
gen log_loon2003 = log(loon2003)
gen log_loon2002 = log(loon2002)
gen log_loon2001 = log(loon2001)
gen log_loon2000 = log(loon2000)
gen log_loon1999 = log(loon1999)

//define tracks
gen vwo=cat==5
gen havo=cat ==4
gen mavo=cat ==3
gen vmbo =cat==2|cat==3
gen lbo =cat==2

//drop irrelevant tracks (special education and dropout; very low n)
drop if cat==1 
drop if cat==6
drop if cat==9
//start from 1
replace cat= cat-1

//rename full-time equivalent variables
rename deeltijdfactor_19990924v1 dtf1999
rename deeltijdfactor_20000929v1 dtf2000
rename deeltijdfactor_20010928v1 dtf2001
rename deeltijdfactor_20020927v1 dtf2002
rename deeltijdfactor_20030926v1 dtf2003
rename deeltijdfactor_20040924v1 dtf2004
rename deeltijdfactor_20050930v1 dtf2005
rename deeltijdfactor_20060929v1 dtf2006
rename deeltijdfactor_20070928v1 dtf2007

//gen wage variables corrected for FTE (first correction)
gen corrected_loon2007 = loon2007/dtf2007
gen corrected_loon2006 = loon2006/dtf2006
gen corrected_loon2005 = loon2005/dtf2005
gen corrected_loon2004 = loon2004/dtf2004
gen corrected_loon2003 = loon2003/dtf2003
gen corrected_loon2002 = loon2002/dtf2002
gen corrected_loon2001 = loon2001/dtf2001

** topcode high wages(second correction)
replace corrected_loon2007 =20000 if corrected_loon2007>20000 & corrected_loon2007!=.
replace corrected_loon2006 =20000 if corrected_loon2006>20000 & corrected_loon2006!=.
replace corrected_loon2005 =20000 if corrected_loon2005>20000 & corrected_loon2005!=.
replace corrected_loon2004 =20000 if corrected_loon2004>20000 & corrected_loon2004!=.
replace corrected_loon2003 =20000 if corrected_loon2003>20000 & corrected_loon2003!=.
replace corrected_loon2002 =20000 if corrected_loon2002>20000 & corrected_loon2002!=.
replace corrected_loon2001 =20000 if corrected_loon2001>20000 & corrected_loon2001!=. 

//exclude those with very low FTE's (third correction)
replace corrected_loon2007 = . if dtf2007<0.25
replace corrected_loon2006 = . if dtf2006<0.25
replace corrected_loon2005 = . if dtf2005<0.25
replace corrected_loon2004 = . if dtf2004<0.25
replace corrected_loon2003 = . if dtf2003<0.25
replace corrected_loon2002 = . if dtf2002<0.25
replace corrected_loon2001 = . if dtf2001<0.25

** logs of corrected wage
gen log_corrected_loon2007 = log(corrected_loon2007)
gen log_corrected_loon2006 = log(corrected_loon2006)
gen log_corrected_loon2005 = log(corrected_loon2005)
gen log_corrected_loon2004 = log(corrected_loon2004)
gen log_corrected_loon2003 = log(corrected_loon2003)
gen log_corrected_loon2002 = log(corrected_loon2002)
gen log_corrected_loon2001 = log(corrected_loon2001)


//drop error values (2 obs in total) 
forvalues v=0/7 {
drop if loon200`v'>=99999 & loon200`v'!=.
}
//main wage variable: average of corrected wages over period 2007-2001
egen loon71 = rmean(log_corrected_loon2007 log_corrected_loon2006 log_corrected_loon2005 log_corrected_loon2004 log_corrected_loon2003 log_corrected_loon2002 log_corrected_loon2001)
//alternative: log of raw wage variable
egen logloon71 = rmean(log_loon2007 log_loon2006 log_loon2005 log_loon2004 log_loon2003 log_loon2002 log_loon2001)

//schoolid
gen schoolnr=.
replace schoolnr= school77 if cohort==1977
replace schoolnr = schnr84 if cohort==1983
replace schoolnr = sbrin89 if cohort==1989
replace schoolnr = schcod93 if cohort==1993

//recode gender variable
replace gesl=gesl-1
//recode parental education variable
drop oplmax
gen oplmax=.
replace oplmax = oplpa if oplpa>oplma & oplpa!=.
replace oplmax = oplma if oplma>oplpa & oplma!=.
replace oplmax = oplma if oplma==oplpa & oplma!=.
replace oplmax = oplma if oplpa==.
replace oplmax = oplpa if oplma==.
bys cohort: egen meanoplmax = mean(oplmax)
replace oplmax = meanoplmax if oplmax==.

//define high and low parental education dummies
gen parHE =oplmax==4
gen parLE =oplmax<=2

//big four cities dummy
replace gr4sted = 2 if gr4sted==9
replace gr4sted=gr4sted-1
replace gr4sted=1-gr4sted
//etnicity dummy
destring etngroep_20070928v1, replace
gen alloch = .
replace alloch = 0 if herkomst2007==0
replace alloch = 1 if herkomst2007>0 & herkomst2007!=.
bys cohort: egen meanalloch = mean(alloch)
replace alloch = meanalloch if alloch==.
//alternative definition, exclude western migrants
gen alloch2= alloch
replace alloch2 =0 if herkomst2007==1

//recode social class
gen socml_old=socml
replace socml=6 if socml==7
replace socml=. if socml==9
replace socml=3 if parLE==1 & socml==.
replace socml=5 if parHE==1 & socml==.
replace socml=4 if parLE==0 & parHE==0 & socml==.

//recode month of birth variable to count from cutoff date (October 1st)
gen gebmnd_rel=gebmnd+3
replace gebmnd_rel=gebmnd_rel-12 if gebmnd_rel>12	

//recode track recommendation 
replace advvojr=6 if advvojr<6 & cohort==1983

//GENERRATE INSTRUMENTS
//for full sample/all tracks:

bys entrtot cohort: egen meanvmbo = mean(vmbo)
bys entrtot cohort: egen meanmavo = mean(mavo)
bys entrtot cohort: egen meanlbo  = mean(lbo)
bys entrtot cohort: egen meanhavo = mean(havo)
bys entrtot cohort: egen meanvwo  = mean(vwo)

//for different variations of track inclusions
//L means one track is excluded
//LL means both other tracks not part of margin are excluded

//this one is used when tracks 2 to 4 are included for T3 vs. T2 estimation
gen mavoL = mavo
replace mavoL=. if cat==1
bys entrtot cohort: egen meanmavoL = mean(mavoL)

gen lboL = lbo
replace lboL=. if cat==4
bys entrtot cohort: egen meanlboL = mean(lboL)

gen havoL = havo
replace havoL=. if cat==4
bys entrtot cohort: egen meanhavoL = mean(havoL)

gen vwoL = vwo
replace vwoL=. if cat==1
bys entrtot cohort: egen meanvwoL = mean(vwoL)

gen vmboL = vmbo
replace vmboL=. if cat==4
bys entrtot cohort: egen meanvmboL = mean(vmboL)

gen vwoLL = vwo
replace vwoLL=. if cat<3
bys entrtot cohort: egen meanvwoLL = mean(vwoLL)

gen havoLL = havo
replace havoLL=. if cat==1|cat==4
bys entrtot cohort: egen meanhavoLL = mean(havoLL)

gen lboLL = lbo
replace lboLL=. if cat>2
bys entrtot cohort: egen meanlboLL = mean(lboLL)

//generate control vectors for figures
quietly reg opljaren gebmnd_rel gr4sted gesl alloch2 I.socml parHE parLE if cohort==1977 & entrtot>=10
predict x_function1977Y1, xb
bys entrtot cohort: egen meanxfunc1977Y1= mean(x_function1977Y1)

quietly reg opljaren gebmnd_rel gr4sted gesl alloch2 I.socml parHE parLE if cohort==1983 & entrtot>=10
predict x_function1983Y1, xb
bys entrtot cohort: egen meanxfunc1983Y1= mean(x_function1983Y1)

quietly reg opljaren gebmnd_rel gr4sted gesl alloch2 I.socml parHE parLE if cohort==1989 & entrtot>=10 
predict x_function1989Y1, xb
bys entrtot cohort: egen meanxfunc1989Y1= mean(x_function1989Y1)

quietly reg opljaren gebmnd_rel gr4sted gesl alloch2 I.socml parHE parLE if cohort==1993 & entrtot>=10 
predict x_function1993Y1, xb
bys entrtot cohort: egen meanxfunc1993Y1= mean(x_function1993Y1)

///////

quietly reg loon71 gebmnd_rel gr4sted gesl alloch2 I.socml parHE parLE if cohort==1977 & entrtot>=10
predict x_function1977Y2, xb
bys entrtot cohort: egen meanxfunc1977Y2= mean(x_function1977Y2)

quietly reg loon71 gebmnd_rel gr4sted gesl alloch2 I.socml parHE parLE if cohort==1983 & entrtot>=10
predict x_function1983Y2, xb
bys entrtot cohort: egen meanxfunc1983Y2= mean(x_function1983Y2)

quietly reg loon71 gebmnd_rel gr4sted gesl alloch2 I.socml parHE parLE if cohort==1989 & entrtot>=10 
predict x_function1989Y2, xb
bys entrtot cohort: egen meanxfunc1989Y2= mean(x_function1989Y2)

quietly reg loon71 gebmnd_rel gr4sted gesl alloch2 I.socml parHE parLE if cohort==1993 & entrtot>=10 
predict x_function1993Y2, xb
bys entrtot cohort: egen meanxfunc1993Y2= mean(x_function1993Y2)

//put subscores per cohort in one variable (needed for imputation later on)
gen cstaal=.
replace cstaal=cstaal1977 if cohort==1977
replace cstaal=cstaal1982 if cohort==1982
replace cstaal=cstaal1989 if cohort==1989
replace cstaal=cstaal1993 if cohort==1993

gen csrek=.
replace csrek=csrek1977 if cohort==1977
replace csrek=csrek1982 if cohort==1982
replace csrek=csrek1989 if cohort==1989
replace csrek=csrek1993 if cohort==1993

//standardize 9th grade achievement
egen nedthetaS=std(nedtheta)
egen wisthetaS=std(wistheta)

/////////////////
//imputation of missing 9th grade test scores
gen nedmiss=nedtheta==.
gen wismiss=wistheta==.

replace nedmiss=. if cohort<=1983
replace wismiss=. if cohort<=1983

impute nedthetaS cstaal cohort, gen (nedtheta_i)
impute wisthetaS csrek cohort, gen (wistheta_i)

gen nedtheta_impA=nedthetaS
replace nedtheta_impA=nedtheta_i if nedmiss==1
gen wistheta_impA=wisthetaS
replace wistheta_impA=wistheta_i if wismiss==1

gen nedtheta_impB=nedtheta_impA-0.5*(nedmiss==1)
gen wistheta_impB=wistheta_impA-0.5*(wismiss==1)

////
//alternative instrument for logistic robustness test
//for years of education (Y1)
logit lbo entrtot if entrtot>=10 & entrtot<=47 & cohort==1977 & cat<4
predict logit_lbo77Y1
logit lbo entrtot if entrtot>=22 & entrtot<=48 & cohort==1983 & cat<4 
predict logit_lbo83Y1
logit lbo entrtot if entrtot>=5 & entrtot<=40 & cohort==1989 & cat<4
predict logit_lbo89Y1
logit lbo entrtot if entrtot>=10 & entrtot<=40 & cohort==1993 & cat<4
predict logit_lbo93Y1

gen logit_lboY1=.
foreach v in 77 83 89 93 {
replace logit_lboY1=logit_lbo`v'Y1 if cohort==`v'
}

logit havo entrtot if entrtot>=33 & entrtot<=70 & cohort==1977 & cat<4
predict logit_havo77Y1
logit havo entrtot if entrtot>=26 & entrtot<=60 & cohort==1983 & cat<4
predict logit_havo83Y1
logit havo entrtot if entrtot>=32 & entrtot<=60 & cohort==1989 & cat<4
predict logit_havo89Y1
logit havo entrtot if entrtot>=28 & entrtot<=60 & cohort==1993 & cat<4
predict logit_havo93Y1

gen logit_havoY1=.
foreach v in 77 83 89 93 {
replace logit_havoY1=logit_havo`v'Y1 if cohort==`v'
}

logit vwo entrtot if entrtot>=15 & entrtot<=64 & cohort==1977
predict logit_vwo77Y1
logit vwo entrtot if entrtot>=21 & entrtot<=60 & cohort==1983
predict logit_vwo83Y1
logit vwo entrtot if entrtot>=20 & entrtot<=53 & cohort==1989
predict logit_vwo89Y1
logit vwo entrtot if entrtot>=10 & entrtot<=60 & cohort==1993 & cat>2
predict logit_vwo93Y1

gen logit_vwoY1=.
foreach v in 77 83 89 93 {
replace logit_vwoY1=logit_vwo`v'Y1 if cohort==`v'
}

//for wages (Y2)
logit lbo entrtot if entrtot>=12 & entrtot<=59 & cohort==1977 & cat<4 & loon71>log(1300)
predict logit_lbo77Y2
logit lbo entrtot if entrtot>=15 & entrtot<=55 & cohort==1983 & cat<4 & loon71>log(1300)
predict logit_lbo83Y2
logit lbo entrtot if entrtot>=19 & entrtot<=55 & cohort==1989 & cat<4 & loon71>log(1300)
predict logit_lbo89Y2

gen logit_lboY2=.
foreach v in 77 83 89 {
replace logit_lboY2=logit_lbo`v'Y2 if cohort==`v'
}

logit havo entrtot if entrtot>=20 & entrtot<=70 & cohort==1977 & cat<4 & loon71>log(1300)
predict logit_havo77Y2
logit havo entrtot if entrtot>=25 & entrtot<=60 & cohort==1983 & cat<4 & loon71>log(1300)
predict logit_havo83Y2
logit havo entrtot if entrtot>=20 & entrtot<=60 & cohort==1989 & cat<4 & loon71>log(1300)
predict logit_havo89Y2

gen logit_havoY2=.
foreach v in 77 83 89 {
replace logit_havoY2=logit_havo`v'Y2 if cohort==`v'
}

logit vwo entrtot if entrtot>=15 & entrtot<=64 & cohort==1977 & loon71>log(1300)
predict logit_vwo77Y2
logit vwo entrtot if entrtot>=21 & entrtot<=60 & cohort==1983 & loon71>log(1300)
predict logit_vwo83Y2
logit vwo entrtot if entrtot>=20 & entrtot<=53 & cohort==1989 & loon71>log(1300)
predict logit_vwo89Y2

gen logit_vwoY2=.
foreach v in 77 83 89 {
replace logit_vwoY2=logit_vwo`v'Y2 if cohort==`v'
}

//get data about study majors and recode (also available through CBS Microdata
merge 1:1 rinpers cohort using "soicat_koppel.dta"
drop if _merge==2

gen soicat=substr(SOI2006richtingHBOPL_20080926V1,1,1)

gen soicat_main07=substr(SOI2006richtingHBOPL_20070928V1,1,1)
gen soicat_main06=substr(SOI2006richtingHBOPL_20060929V1,1,1)
gen soicat_main05=substr(SOI2006richtingHBOPL_20050930V1,1,1)
gen soicat_main04=substr(SOI2006richtingHBOPL_20040924V1,1,1)
gen soicat_main03=substr(SOI2006richtingHBOPL_20030926V1,1,1)
gen soicat_main02=substr(SOI2006richtingHBOPL_20020927V1,1,1)
gen soicat_main01=substr(SOI2006richtingHBOPL_20010928V1,1,1)
gen soicat_main00=substr(SOI2006richtingHBOPL_20000929V1,1,1)
gen soicat_main99=substr(SOI2006richtingHBOPL_19990924V1,1,1)

forvalues v=1/7 {
replace soicat=soicat_main0`v' if soicat=="0"|soicat==" "
}

//study major dummies for higher education
gen teacher=soicat=="1"
gen human=soicat=="2"
gen econ=soicat=="3"
gen law=soicat=="4"
gen math=soicat=="5"
gen tech=soicat=="6"
gen farm=soicat=="7"
gen health=soicat=="8"
gen leisure=soicat=="9"

//same for post-secondary non-tertiary education
gen hbo=opljaren==17
gen university=opljaren==19

gen mbo =opljaren==14
gen mbo_econ=mbo==1 & sec_hb==5
gen mbo_tech=mbo==1 & sec_hb==3
gen mbo_zw=mbo==1 & sec_hb==4
gen mbo_other=mbo==1 & sec_hb==1|sec_hb==2|sec_hb==6

//create broad sectors from study majors
//first approach: for all levels jointly
gen sector1=health==1|teacher==1|leisure==1|farm==1|mbo_zw==1|human==1
gen sector2=econ==1|law==1|mbo_econ==1
gen sector3=tech==1|math==1|mbo_tech==1
gen sector4=mbo_other==1

//second approach: only higher education
gen sector1A=health==1|teacher==1|leisure==1|farm==1|human==1
gen sector2A=econ==1|law==1
gen sector3A=tech==1|math==1
gen sector4A=(hbo==1|university==1) & (sector1A==0 & sector2A==0 & sector3A==0)

gen sector=.
replace sector=1 if sector1==1
replace sector=2 if sector2==1
replace sector=3 if sector3==1
replace sector=4 if sector4==1

gen sectorA=.
replace sectorA=1 if sector1A==1
replace sectorA=2 if sector2A==1
replace sectorA=3 if sector3A==1
replace sectorA=4 if sector4A==1

label define cat 1 "T1" 2 "T2" 3 "T3" 4 "T4", modify

//coding for figures
gen loonmiss=loon71==.
bys entrtot cat cohort: egen meanyosECC = mean(opljaren)
bys entrtot cat cohort loonmiss: egen meanloonECC = mean(loon71)

bys entrtot cat cohort: gen countyosECC = _N 
bys entrtot cat cohort loonmiss: gen countloonECC = _N 

replace meanyosECC=. if countyosECC<20
replace meanloonECC=. if countloonECC<20 & loonmiss==0

gen opljaren_cat=1 if opljaren==6
replace opljaren_cat=2 if opljaren==10|opljaren==11|opljaren==12
replace opljaren_cat=3 if opljaren==13|opljaren==15
replace opljaren_cat=4 if opljaren==14
replace opljaren_cat=5 if opljaren==17
replace opljaren_cat=6 if opljaren==19

gen ocat1=opljaren_cat==1
gen ocat2=opljaren_cat==2
gen ocat3=opljaren_cat==3
gen ocat4=opljaren_cat==4
gen ocat5=opljaren_cat==5
gen ocat6=opljaren_cat==6

******************************************************************
**PART 2: Regression analysis on main data file for results presented in the main paper
******************************************************************

//NOTE THAT ALL ESTIMATES FOR LBO ARE INVERTED IN THE REPORTED RESULTS (i.e. multiplied by -1), AS WE ALWAYS REPORT THE EFFECT OF ATTENDING THE HIGHER TRACK AT THE MARGIN

//Table 1
bys cohort: sum lbo mavo havo vwo entrtot opljaren  corrected_loon2007 corrected_loon2006 corrected_loon2005 corrected_loon2004 corrected_loon2003 corrected_loon2002 corrected_loon2001 gesl gr4sted alloch2 parHE parLE socml_lager socml_hoger

//Table 2
//NO CONTROLS
reg opljaren lbo entrtot if entrtot>=10 & entrtot<=47 & cohort==1977 & cat<4, robust cluster (schoolnr)
reg opljaren lbo entrtot if entrtot>=22 & entrtot<=48 & cohort==1983 & cat<4, robust cluster (schoolnr)
reg opljaren lbo entrtot if entrtot>=5 & entrtot<=40 & cohort==1989 & cat<4, robust cluster (schoolnr)
reg opljaren lbo entrtot if entrtot>=10 & entrtot<=40 & cohort==1993 & cat<4, robust cluster (schoolnr)

reg opljaren havo entrtot if entrtot>=33 & entrtot<=70 & cohort==1977 & cat<4, robust cluster (schoolnr)
reg opljaren havo entrtot if entrtot>=26 & entrtot<=60 & cohort==1983 & cat<4, robust cluster (schoolnr)
reg opljaren havo entrtot if entrtot>=32 & entrtot<=60 & cohort==1989 & cat<4, robust cluster (schoolnr)
reg opljaren havo entrtot if entrtot>=28 & entrtot<=60 & cohort==1993 & cat<4, robust cluster (schoolnr)

reg opljaren vwo entrtot if entrtot>=15 & entrtot<=64 & cohort==1977, robust cluster (schoolnr)
reg opljaren vwo entrtot if entrtot>=21 & entrtot<=60 & cohort==1983, robust cluster (schoolnr)
reg opljaren vwo entrtot if entrtot>=20 & entrtot<=53 & cohort==1989, robust cluster (schoolnr)
reg opljaren vwo entrtot if entrtot>=10 & entrtot<=60 & cohort==1993 & cat>2, robust cluster (schoolnr)

reg loon71 lbo entrtot if entrtot>=12 & entrtot<=59 & cohort==1977 & cat<4 & loon71>log(1300), robust cluster (schoolnr)
reg loon71 lbo entrtot if entrtot>=15 & entrtot<=55 & cohort==1983 & cat<4 & loon71>log(1300), robust cluster (schoolnr)
reg loon71 lbo entrtot if entrtot>=19 & entrtot<=55 & cohort==1989 & cat<4 & loon71>log(1300), robust cluster (schoolnr)

reg loon71 havo entrtot if entrtot>=20 & entrtot<=70 & cohort==1977 & cat<4 & loon71>log(1300), robust cluster (schoolnr)
reg loon71 havo entrtot if entrtot>=25 & entrtot<=60 & cohort==1983 & cat<4 & loon71>log(1300), robust cluster (schoolnr)
reg loon71 havo entrtot if entrtot>=20 & entrtot<=60 & cohort==1989 & cat<4 & loon71>log(1300), robust cluster (schoolnr)

reg loon71 vwo entrtot if entrtot>=15 & entrtot<=64 & cohort==1977 & loon71>log(1300), robust cluster (schoolnr)
reg loon71 vwo entrtot if entrtot>=21 & entrtot<=60 & cohort==1983 & loon71>log(1300), robust cluster (schoolnr)
reg loon71 vwo entrtot if entrtot>=20 & entrtot<=53 & cohort==1989 & loon71>log(1300), robust cluster (schoolnr)

//WITH CONTROLS
reg opljaren lbo gebmnd_rel gr4sted gesl entrtot alloch2 I.socml parHE parLE if entrtot>=10 & entrtot<=47 & cohort==1977 & cat<4, robust cluster (schoolnr)
reg opljaren lbo gebmnd_rel gr4sted gesl entrtot alloch2 I.socml parHE parLE if entrtot>=22 & entrtot<=48 & cohort==1983 & cat<4, robust cluster (schoolnr)
reg opljaren lbo gebmnd_rel gr4sted gesl entrtot alloch2 I.socml parHE parLE if entrtot>=5 & entrtot<=40 & cohort==1989 & cat<4, robust cluster (schoolnr)
reg opljaren lbo gebmnd_rel gr4sted gesl entrtot alloch2 I.socml parHE parLE if entrtot>=10 & entrtot<=40 & cohort==1993 & cat<4, robust cluster (schoolnr)

reg opljaren havo gebmnd_rel gr4sted gesl entrtot alloch2 I.socml parHE parLE if entrtot>=33 & entrtot<=70 & cohort==1977 & cat<4, robust cluster (schoolnr)
reg opljaren havo gebmnd_rel gr4sted gesl entrtot alloch2 I.socml parHE parLE if entrtot>=26 & entrtot<=60 & cohort==1983 & cat<4, robust cluster (schoolnr)
reg opljaren havo gebmnd_rel gr4sted gesl entrtot alloch2 I.socml parHE parLE if entrtot>=32 & entrtot<=60 & cohort==1989 & cat<4, robust cluster (schoolnr)
reg opljaren havo gebmnd_rel gr4sted gesl entrtot alloch2 I.socml parHE parLE if entrtot>=28 & entrtot<=60 & cohort==1993 & cat<4, robust cluster (schoolnr)

reg opljaren vwo gebmnd_rel gr4sted gesl entrtot alloch2 I.socml parHE parLE if entrtot>=15 & entrtot<=64 & cohort==1977, robust cluster (schoolnr)
reg opljaren vwo gebmnd_rel gr4sted gesl entrtot alloch2 I.socml parHE parLE if entrtot>=21 & entrtot<=60 & cohort==1983, robust cluster (schoolnr)
reg opljaren vwo gebmnd_rel gr4sted gesl entrtot alloch2 I.socml parHE parLE if entrtot>=20 & entrtot<=53 & cohort==1989, robust cluster (schoolnr)
reg opljaren vwo gebmnd_rel gr4sted gesl entrtot alloch2 I.socml parHE parLE if entrtot>=10 & entrtot<=60 & cohort==1993 & cat>2, robust cluster (schoolnr)

reg loon71 lbo entrtot gebmnd_rel gr4sted  gesl alloch2 I.socml parHE parLE if entrtot>=12 & entrtot<=59 & cohort==1977 & cat<4 & loon71>log(1300), robust cluster (schoolnr)
reg loon71 lbo entrtot gebmnd_rel gr4sted  gesl alloch2 I.socml parHE parLE if entrtot>=15 & entrtot<=55 & cohort==1983 & cat<4 & loon71>log(1300), robust cluster (schoolnr)
reg loon71 lbo entrtot gebmnd_rel gr4sted  gesl alloch2 I.socml parHE parLE if entrtot>=19 & entrtot<=55 & cohort==1989 & cat<4 & loon71>log(1300), robust cluster (schoolnr)

reg loon71 havo entrtot gebmnd_rel gr4sted  gesl alloch2 I.socml parHE parLE if entrtot>=20 & entrtot<=70 & cohort==1977 & cat<4 & loon71>log(1300), robust cluster (schoolnr)
reg loon71 havo entrtot gebmnd_rel gr4sted  gesl alloch2 I.socml parHE parLE if entrtot>=25 & entrtot<=60 & cohort==1983 & cat<4 & loon71>log(1300), robust cluster (schoolnr)
reg loon71 havo entrtot gebmnd_rel gr4sted  gesl alloch2 I.socml parHE parLE if entrtot>=20 & entrtot<=60 & cohort==1989 & cat<4 & loon71>log(1300), robust cluster (schoolnr)

reg loon71 vwo entrtot gebmnd_rel gr4sted  gesl alloch2 I.socml parHE parLE if entrtot>=15 & entrtot<=64 & cohort==1977 & loon71>log(1300), robust cluster (schoolnr)
reg loon71 vwo entrtot gebmnd_rel gr4sted  gesl alloch2 I.socml parHE parLE if entrtot>=21 & entrtot<=60 & cohort==1983 & loon71>log(1300), robust cluster (schoolnr)
reg loon71 vwo entrtot gebmnd_rel gr4sted  gesl alloch2 I.socml parHE parLE if entrtot>=20 & entrtot<=53 & cohort==1989 & loon71>log(1300), robust cluster (schoolnr)

//Table 3
ivreg2 opljaren (lbo = meanlboL) gebmnd_rel gr4sted gesl entrtot alloch2 I.socml parHE parLE if entrtot>=10 & entrtot<=47 & cohort==1977 & cat<4, robust cluster (schoolnr)
ivreg2 opljaren (lbo = meanlboL) gebmnd_rel gr4sted gesl entrtot alloch2 I.socml parHE parLE if entrtot>=22 & entrtot<=48 & cohort==1983 & cat<4, robust cluster (schoolnr)
ivreg2 opljaren (lbo = meanlboL) gebmnd_rel gr4sted gesl entrtot alloch2 I.socml parHE parLE if entrtot>=5 & entrtot<=40 & cohort==1989 & cat<4, robust cluster (schoolnr)
ivreg2 opljaren (lbo = meanlboL) gebmnd_rel gr4sted gesl entrtot alloch2 I.socml parHE parLE if entrtot>=10 & entrtot<=40 & cohort==1993 & cat<4, robust cluster (schoolnr)

ivreg2 opljaren (havo = meanhavoL) gebmnd_rel gr4sted gesl entrtot alloch2 I.socml parHE parLE if entrtot>=33 & entrtot<=70 & cohort==1977 & cat<4, robust cluster (schoolnr)
ivreg2 opljaren (havo = meanhavoL) gebmnd_rel gr4sted gesl entrtot alloch2 I.socml parHE parLE if entrtot>=26 & entrtot<=60 & cohort==1983 & cat<4, robust cluster (schoolnr)
ivreg2 opljaren (havo = meanhavoL) gebmnd_rel gr4sted gesl entrtot alloch2 I.socml parHE parLE if entrtot>=32 & entrtot<=60 & cohort==1989 & cat<4, robust cluster (schoolnr)
ivreg2 opljaren (havo = meanhavoL) gebmnd_rel gr4sted gesl entrtot alloch2 I.socml parHE parLE if entrtot>=28 & entrtot<=60 & cohort==1993 & cat<4, robust cluster (schoolnr)

ivreg2 opljaren (vwo = meanvwo) gebmnd_rel gr4sted gesl entrtot alloch2 I.socml parHE parLE if entrtot>=15 & entrtot<=64 & cohort==1977, robust cluster (schoolnr)
ivreg2 opljaren (vwo = meanvwo) gebmnd_rel gr4sted gesl entrtot alloch2 I.socml parHE parLE if entrtot>=21 & entrtot<=60 & cohort==1983, robust cluster (schoolnr)
ivreg2 opljaren (vwo = meanvwo) gebmnd_rel gr4sted gesl entrtot alloch2 I.socml parHE parLE if entrtot>=20 & entrtot<=53 & cohort==1989, robust cluster (schoolnr)
ivreg2 opljaren (vwo = meanvwoLL) gebmnd_rel gr4sted gesl entrtot alloch2 I.socml parHE parLE if entrtot>=10 & entrtot<=60 & cohort==1993 & cat>2, robust cluster (schoolnr)


ivreg2 loon71 (lbo = meanlboL) gebmnd_rel gr4sted gesl entrtot alloch2 I.socml parHE parLE if entrtot>=12 & entrtot<=59 & cohort==1977 & cat<4 & loon71>log(1300), robust cluster (schoolnr)
ivreg2 loon71 (lbo = meanlboL) gebmnd_rel gr4sted gesl entrtot alloch2 I.socml parHE parLE if entrtot>=15 & entrtot<=55 & cohort==1983 & cat<4 & loon71>log(1300), robust cluster (schoolnr)
ivreg2 loon71 (lbo = meanlboL) gebmnd_rel gr4sted gesl entrtot alloch2 I.socml parHE parLE if entrtot>=19 & entrtot<=55 & cohort==1989 & cat<4 & loon71>log(1300), robust cluster (schoolnr)

ivreg2 loon71 (havo = meanhavoL) gebmnd_rel gr4sted gesl entrtot alloch2 I.socml parHE parLE if entrtot>=20 & entrtot<=70 & cohort==1977 & cat<4 & loon71>log(1300), robust cluster (schoolnr)
ivreg2 loon71 (havo = meanhavoL) gebmnd_rel gr4sted gesl entrtot alloch2 I.socml parHE parLE if entrtot>=25 & entrtot<=60 & cohort==1983 & cat<4 & loon71>log(1300), robust cluster (schoolnr)
ivreg2 loon71 (havo = meanhavoL) gebmnd_rel gr4sted gesl entrtot alloch2 I.socml parHE parLE if entrtot>=20 & entrtot<=60 & cohort==1989 & cat<4 & loon71>log(1300), robust cluster (schoolnr)

ivreg2 loon71 (vwo = meanvwo) gebmnd_rel gr4sted gesl entrtot alloch2 I.socml parHE parLE if entrtot>=15 & entrtot<=64 & cohort==1977 & loon71>log(1300), robust cluster (schoolnr)
ivreg2 loon71 (vwo = meanvwo) gebmnd_rel gr4sted gesl entrtot alloch2 I.socml parHE parLE if entrtot>=21 & entrtot<=60 & cohort==1983 & loon71>log(1300), robust cluster (schoolnr)
ivreg2 loon71 (vwo = meanvwo) gebmnd_rel gr4sted gesl entrtot alloch2 I.socml parHE parLE if entrtot>=20 & entrtot<=53 & cohort==1989 & loon71>log(1300), robust cluster (schoolnr)

//TABLE 4 (lower panel of Table 4 is run for the separate VOCL 1999 dataset and is listed further below)
//nedthetaS = language; wisthetaS = math
//FIRST: base results
ivreg2 nedthetaS (lbo = meanlboL) gebmnd_rel gr4sted gesl entrtot alloch2 I.socml parHE parLE if entrtot>=5 & entrtot<=40 & cohort==1989 & cat<4, robust cluster (schoolnr)
ivreg2 wisthetaS (lbo = meanlboL) gebmnd_rel gr4sted gesl entrtot alloch2 I.socml parHE parLE if entrtot>=5 & entrtot<=40 & cohort==1989 & cat<4, robust cluster (schoolnr)
ivreg2 nedthetaS (havo = meanhavoLL) gebmnd_rel gr4sted gesl entrtot alloch2 I.socml parHE parLE if entrtot>=20 & entrtot<=50 & cohort==1989 & cat>1 & cat<4, robust cluster (schoolnr)
ivreg2 wisthetaS (havo = meanhavoLL) gebmnd_rel gr4sted gesl entrtot alloch2 I.socml parHE parLE if entrtot>=20 & entrtot<=50 & cohort==1989 & cat>1 & cat<4, robust cluster (schoolnr)
ivreg2 nedthetaS (vwo = meanvwo) gebmnd_rel gr4sted gesl entrtot alloch2 I.socml parHE parLE if entrtot>=20 & entrtot<=53 & cohort==1989, robust cluster (schoolnr)
ivreg2 wisthetaS (vwo = meanvwo) gebmnd_rel gr4sted gesl entrtot alloch2 I.socml parHE parLE if entrtot>=20 & entrtot<=53 & cohort==1989, robust cluster (schoolnr)

ivreg2 nedthetaS (lbo = meanlboL) gebmnd_rel gr4sted gesl entrtot alloch2 I.socml parHE parLE if entrtot>=10 & entrtot<=40 & cohort==1993 & cat<4, robust cluster (schoolnr)
ivreg2 wisthetaS (lbo = meanlboL) gebmnd_rel gr4sted gesl entrtot alloch2 I.socml parHE parLE if entrtot>=10 & entrtot<=40 & cohort==1993 & cat<4, robust cluster (schoolnr)
ivreg2 nedthetaS (havo = meanhavoLL) gebmnd_rel gr4sted gesl entrtot alloch2 I.socml parHE parLE if entrtot>=20 & entrtot<=60 & cohort==1993 & cat>1 & cat<4, robust cluster (schoolnr)
ivreg2 wisthetaS (havo = meanhavoLL) gebmnd_rel gr4sted gesl entrtot alloch2 I.socml parHE parLE if entrtot>=20 & entrtot<=60 & cohort==1993 & cat>1 & cat<4, robust cluster (schoolnr)
ivreg2 nedthetaS (vwo = meanvwo) gebmnd_rel gr4sted gesl entrtot alloch2 I.socml parHE parLE if entrtot>=10 & entrtot<=60 & cohort==1993 & cat>2, robust cluster (schoolnr)
ivreg2 wisthetaS (vwo = meanvwo) gebmnd_rel gr4sted gesl entrtot alloch2 I.socml parHE parLE if entrtot>=10 & entrtot<=60 & cohort==1993 & cat>2, robust cluster (schoolnr)

//SECOND: with imputed missing values
ivreg2 nedtheta_impA (lbo = meanlboL) gebmnd_rel gr4sted gesl entrtot alloch2 I.socml parHE parLE if entrtot>=5 & entrtot<=40 & cohort==1989 & cat<4, robust cluster (schoolnr)
ivreg2 wistheta_impA (lbo = meanlboL) gebmnd_rel gr4sted gesl entrtot alloch2 I.socml parHE parLE if entrtot>=5 & entrtot<=40 & cohort==1989 & cat<4, robust cluster (schoolnr)
ivreg2 nedtheta_impA (havo = meanhavoLL) gebmnd_rel gr4sted gesl entrtot alloch2 I.socml parHE parLE if entrtot>=20 & entrtot<=50 & cohort==1989 & cat>1 & cat<4, robust cluster (schoolnr)
ivreg2 wistheta_impA (havo = meanhavoLL) gebmnd_rel gr4sted gesl entrtot alloch2 I.socml parHE parLE if entrtot>=20 & entrtot<=50 & cohort==1989 & cat>1 & cat<4, robust cluster (schoolnr)
ivreg2 nedtheta_impA (vwo = meanvwo) gebmnd_rel gr4sted gesl entrtot alloch2 I.socml parHE parLE if entrtot>=20 & entrtot<=53 & cohort==1989, robust cluster (schoolnr)
ivreg2 wistheta_impA (vwo = meanvwo) gebmnd_rel gr4sted gesl entrtot alloch2 I.socml parHE parLE if entrtot>=20 & entrtot<=53 & cohort==1989, robust cluster (schoolnr)

ivreg2 nedtheta_impA (lbo = meanlboL) gebmnd_rel gr4sted gesl entrtot alloch2 I.socml parHE parLE if entrtot>=10 & entrtot<=40 & cohort==1993 & cat<4, robust cluster (schoolnr)
ivreg2 wistheta_impA (lbo = meanlboL) gebmnd_rel gr4sted gesl entrtot alloch2 I.socml parHE parLE if entrtot>=10 & entrtot<=40 & cohort==1993 & cat<4, robust cluster (schoolnr)
ivreg2 nedtheta_impA (havo = meanhavoLL) gebmnd_rel gr4sted gesl entrtot alloch2 I.socml parHE parLE if entrtot>=20 & entrtot<=60 & cohort==1993 & cat>1 & cat<4, robust cluster (schoolnr)
ivreg2 wistheta_impA (havo = meanhavoLL) gebmnd_rel gr4sted gesl entrtot alloch2 I.socml parHE parLE if entrtot>=20 & entrtot<=60 & cohort==1993 & cat>1 & cat<4, robust cluster (schoolnr)
ivreg2 nedtheta_impA (vwo = meanvwo) gebmnd_rel gr4sted gesl entrtot alloch2 I.socml parHE parLE if entrtot>=10 & entrtot<=60 & cohort==1993 & cat>2, robust cluster (schoolnr)
ivreg2 wistheta_impA (vwo = meanvwo) gebmnd_rel gr4sted gesl entrtot alloch2 I.socml parHE parLE if entrtot>=10 & entrtot<=60 & cohort==1993 & cat>2, robust cluster (schoolnr)

//THIRD: alternative imputation where we subtract 0.5sd from imputed values
ivreg2 nedtheta_impB (lbo = meanlboL) gebmnd_rel gr4sted gesl entrtot alloch2 I.socml parHE parLE if entrtot>=5 & entrtot<=40 & cohort==1989 & cat<4, robust cluster (schoolnr)
ivreg2 wistheta_impB (lbo = meanlboL) gebmnd_rel gr4sted gesl entrtot alloch2 I.socml parHE parLE if entrtot>=5 & entrtot<=40 & cohort==1989 & cat<4, robust cluster (schoolnr)
ivreg2 nedtheta_impB (havo = meanhavoLL) gebmnd_rel gr4sted gesl entrtot alloch2 I.socml parHE parLE if entrtot>=20 & entrtot<=50 & cohort==1989 & cat>1 & cat<4, robust cluster (schoolnr)
ivreg2 wistheta_impB (havo = meanhavoLL) gebmnd_rel gr4sted gesl entrtot alloch2 I.socml parHE parLE if entrtot>=20 & entrtot<=50 & cohort==1989 & cat>1 & cat<4, robust cluster (schoolnr)
ivreg2 nedtheta_impB (vwo = meanvwo) gebmnd_rel gr4sted gesl entrtot alloch2 I.socml parHE parLE if entrtot>=20 & entrtot<=53 & cohort==1989, robust cluster (schoolnr)
ivreg2 wistheta_impB (vwo = meanvwo) gebmnd_rel gr4sted gesl entrtot alloch2 I.socml parHE parLE if entrtot>=20 & entrtot<=53 & cohort==1989, robust cluster (schoolnr)

ivreg2 nedtheta_impB (lbo = meanlboL) gebmnd_rel gr4sted gesl entrtot alloch2 I.socml parHE parLE if entrtot>=10 & entrtot<=40 & cohort==1993 & cat<4, robust cluster (schoolnr)
ivreg2 wistheta_impB (lbo = meanlboL) gebmnd_rel gr4sted gesl entrtot alloch2 I.socml parHE parLE if entrtot>=10 & entrtot<=40 & cohort==1993 & cat<4, robust cluster (schoolnr)
ivreg2 nedtheta_impB (havo = meanhavoLL) gebmnd_rel gr4sted gesl entrtot alloch2 I.socml parHE parLE if entrtot>=20 & entrtot<=60 & cohort==1993 & cat>1 & cat<4, robust cluster (schoolnr)
ivreg2 wistheta_impB (havo = meanhavoLL) gebmnd_rel gr4sted gesl entrtot alloch2 I.socml parHE parLE if entrtot>=20 & entrtot<=60 & cohort==1993 & cat>1 & cat<4, robust cluster (schoolnr)
ivreg2 nedtheta_impB (vwo = meanvwo) gebmnd_rel gr4sted gesl entrtot alloch2 I.socml parHE parLE if entrtot>=10 & entrtot<=60 & cohort==1993 & cat>2, robust cluster (schoolnr)
ivreg2 wistheta_impB (vwo = meanvwo) gebmnd_rel gr4sted gesl entrtot alloch2 I.socml parHE parLE if entrtot>=10 & entrtot<=60 & cohort==1993 & cat>2, robust cluster (schoolnr)

//TABLE 5

//RESULTS WITH NO CONTROLS
ivreg2 opljaren (lbo = meanlboL) entrtot if entrtot>=10 & entrtot<=47 & cohort==1977 & cat<4, robust cluster (schoolnr)
ivreg2 opljaren (lbo = meanlboL) entrtot if entrtot>=22 & entrtot<=48 & cohort==1983 & cat<4, robust cluster (schoolnr)
ivreg2 opljaren (lbo = meanlboL) entrtot if entrtot>=5 & entrtot<=40 & cohort==1989 & cat<4, robust cluster (schoolnr)
ivreg2 opljaren (lbo = meanlboL) entrtot if entrtot>=10 & entrtot<=40 & cohort==1993 & cat<4, robust cluster (schoolnr)

ivreg2 opljaren (havo = meanhavoL) entrtot if entrtot>=33 & entrtot<=70 & cohort==1977 & cat<4, robust cluster (schoolnr)
ivreg2 opljaren (havo = meanhavoL) entrtot if entrtot>=26 & entrtot<=60 & cohort==1983 & cat<4, robust cluster (schoolnr)
ivreg2 opljaren (havo = meanhavoL) entrtot if entrtot>=32 & entrtot<=60 & cohort==1989 & cat<4, robust cluster (schoolnr)
ivreg2 opljaren (havo = meanhavoL) entrtot if entrtot>=28 & entrtot<=60 & cohort==1993 & cat<4, robust cluster (schoolnr)

ivreg2 opljaren (vwo = meanvwo) entrtot if entrtot>=15 & entrtot<=64 & cohort==1977, robust cluster (schoolnr)
ivreg2 opljaren (vwo = meanvwo) entrtot if entrtot>=21 & entrtot<=60 & cohort==1983, robust cluster (schoolnr)
ivreg2 opljaren (vwo = meanvwo) entrtot if entrtot>=20 & entrtot<=53 & cohort==1989, robust cluster (schoolnr)
ivreg2 opljaren (vwo = meanvwoLL) entrtot if entrtot>=10 & entrtot<=60 & cohort==1993 & cat>2, robust cluster (schoolnr)

ivreg2 loon71 (lbo = meanlboL) gesl entrtot if entrtot>=12 & entrtot<=59 & cohort==1977 & cat<4 & loon71>log(1300), robust cluster (schoolnr)
ivreg2 loon71 (lbo = meanlboL) entrtot gesl if entrtot>=15 & entrtot<=55 & cohort==1983 & cat<4 & loon71>log(1300), robust cluster (schoolnr)
ivreg2 loon71 (lbo = meanlboL) entrtot gesl if entrtot>=19 & entrtot<=55 & cohort==1989 & cat<4 & loon71>log(1300), robust cluster (schoolnr)

ivreg2 loon71 (havo = meanhavoL) entrtot gesl if entrtot>=20 & entrtot<=70 & cohort==1977 & cat<4 & loon71>log(1300), robust cluster (schoolnr)
ivreg2 loon71 (havo = meanhavoL) entrtot gesl if entrtot>=25 & entrtot<=60 & cohort==1983 & cat<4 & loon71>log(1300), robust cluster (schoolnr)
ivreg2 loon71 (havo = meanhavoL) entrtot gesl if entrtot>=20 & entrtot<=60 & cohort==1989 & cat<4 & loon71>log(1300), robust cluster (schoolnr)

ivreg2 loon71 (vwo = meanvwo) entrtot gesl if entrtot>=15 & entrtot<=64 & cohort==1977 & loon71>log(1300), robust cluster (schoolnr)
ivreg2 loon71 (vwo = meanvwo) entrtot gesl if entrtot>=21 & entrtot<=60 & cohort==1983 & loon71>log(1300), robust cluster (schoolnr)
ivreg2 loon71 (vwo = meanvwo) entrtot gesl if entrtot>=20 & entrtot<=53 & cohort==1989 & loon71>log(1300), robust cluster (schoolnr)

//RESULTS WITH TEACHER RECOMMENDATION AS ADDITIONAL CONTROL
ivreg2 opljaren (lbo = meanlboL) gebmnd_rel gr4sted gesl entrtot alloch2 I.socml parHE parLE advvojr if entrtot>=10 & entrtot<=47 & cohort==1977 & cat<4, robust cluster (schoolnr)
ivreg2 opljaren (lbo = meanlboL) gebmnd_rel gr4sted gesl entrtot alloch2 I.socml parHE parLE advvojr if entrtot>=22 & entrtot<=48 & cohort==1983 & cat<4, robust cluster (schoolnr)
ivreg2 opljaren (lbo = meanlboL) gebmnd_rel gr4sted gesl entrtot alloch2 I.socml parHE parLE advvojr if entrtot>=5 & entrtot<=40 & cohort==1989 & cat<4, robust cluster (schoolnr)
ivreg2 opljaren (lbo = meanlboL) gebmnd_rel gr4sted gesl entrtot alloch2 I.socml parHE parLE advvojr if entrtot>=10 & entrtot<=40 & cohort==1993 & cat<4, robust cluster (schoolnr)

ivreg2 opljaren (havo = meanhavoL) gebmnd_rel gr4sted gesl entrtot alloch2 I.socml parHE parLE advvojr if entrtot>=33 & entrtot<=70 & cohort==1977 & cat<4, robust cluster (schoolnr)
ivreg2 opljaren (havo = meanhavoL) gebmnd_rel gr4sted gesl entrtot alloch2 I.socml parHE parLE advvojr if entrtot>=26 & entrtot<=60 & cohort==1983 & cat<4, robust cluster (schoolnr)
ivreg2 opljaren (havo = meanhavoL) gebmnd_rel gr4sted gesl entrtot alloch2 I.socml parHE parLE advvojr if entrtot>=32 & entrtot<=60 & cohort==1989 & cat<4, robust cluster (schoolnr)
ivreg2 opljaren (havo = meanhavoL) gebmnd_rel gr4sted gesl entrtot alloch2 I.socml parHE parLE advvojr if entrtot>=28 & entrtot<=60 & cohort==1993 & cat<4, robust cluster (schoolnr)

ivreg2 opljaren (vwo = meanvwo) gebmnd_rel gr4sted gesl entrtot alloch2 I.socml parHE parLE advvojr if entrtot>=15 & entrtot<=64 & cohort==1977, robust cluster (schoolnr)
ivreg2 opljaren (vwo = meanvwo) gebmnd_rel gr4sted gesl entrtot alloch2 I.socml parHE parLE advvojr if entrtot>=21 & entrtot<=60 & cohort==1983, robust cluster (schoolnr)
ivreg2 opljaren (vwo = meanvwo) gebmnd_rel gr4sted gesl entrtot alloch2 I.socml parHE parLE advvojr if entrtot>=20 & entrtot<=53 & cohort==1989, robust cluster (schoolnr)
ivreg2 opljaren (vwo = meanvwoLL) gebmnd_rel gr4sted gesl entrtot alloch2 I.socml parHE parLE advvojr if entrtot>=10 & entrtot<=60 & cohort==1993 & cat>2, robust cluster (schoolnr)


ivreg2 loon71 (lbo = meanlboL) gebmnd_rel gr4sted gesl entrtot alloch2 I.socml parHE parLE advvojr if entrtot>=12 & entrtot<=59 & cohort==1977 & cat<4 & loon71>log(1300), robust cluster (schoolnr)
ivreg2 loon71 (lbo = meanlboL) gebmnd_rel gr4sted gesl entrtot alloch2 I.socml parHE parLE advvojr if entrtot>=15 & entrtot<=55 & cohort==1983 & cat<4 & loon71>log(1300), robust cluster (schoolnr)
ivreg2 loon71 (lbo = meanlboL) gebmnd_rel gr4sted gesl entrtot alloch2 I.socml parHE parLE advvojr if entrtot>=19 & entrtot<=55 & cohort==1989 & cat<4 & loon71>log(1300), robust cluster (schoolnr)

ivreg2 loon71 (havo = meanhavoL) gebmnd_rel gr4sted gesl entrtot alloch2 I.socml parHE parLE advvojr if entrtot>=20 & entrtot<=70 & cohort==1977 & cat<4 & loon71>log(1300), robust cluster (schoolnr)
ivreg2 loon71 (havo = meanhavoL) gebmnd_rel gr4sted gesl entrtot alloch2 I.socml parHE parLE advvojr if entrtot>=25 & entrtot<=60 & cohort==1983 & cat<4 & loon71>log(1300), robust cluster (schoolnr)
ivreg2 loon71 (havo = meanhavoL) gebmnd_rel gr4sted gesl entrtot alloch2 I.socml parHE parLE advvojr if entrtot>=20 & entrtot<=60 & cohort==1989 & cat<4 & loon71>log(1300), robust cluster (schoolnr)

ivreg2 loon71 (vwo = meanvwo) gebmnd_rel gr4sted gesl entrtot alloch2 I.socml parHE parLE advvojr if entrtot>=15 & entrtot<=64 & cohort==1977 & loon71>log(1300), robust cluster (schoolnr)
ivreg2 loon71 (vwo = meanvwo) gebmnd_rel gr4sted gesl entrtot alloch2 I.socml parHE parLE advvojr if entrtot>=21 & entrtot<=60 & cohort==1983 & loon71>log(1300), robust cluster (schoolnr)
ivreg2 loon71 (vwo = meanvwo) gebmnd_rel gr4sted gesl entrtot alloch2 I.socml parHE parLE advvojr if entrtot>=20 & entrtot<=53 & cohort==1989 & loon71>log(1300), robust cluster (schoolnr)

///
//FIGURES

//FIGURE 3
binscatter lbo entrtot if cohort==1977 & cat<4, discrete name(lbo77) linetype(none)
binscatter lbo entrtot if cohort==1983 & cat<4, discrete name(lbo82) linetype(none)
binscatter lbo entrtot if cohort==1989 & cat<4, discrete name(lbo89) linetype(none)
binscatter lbo entrtot if cohort==1993 & cat<4, discrete name(lbo93) linetype(none)

graph combine lbo77 lbo82 lbo89 lbo93, col(2)

//FIGURE 4
binscatter havo entrtot if entrtot>5 & cohort==1977 & cat<4, discrete name(havo77) linetype(none)
binscatter havo entrtot if entrtot>5 & cohort==1983 & cat<4, discrete name(havo82) linetype(none)
binscatter havo entrtot if entrtot>5 & cohort==1989 & cat<4, discrete name(havo89) linetype(none)
binscatter havo entrtot if entrtot>5 & cohort==1993 & cat<4, discrete name(havo93) linetype(none)

graph combine havo77 havo82 havo89 havo93, col(2)

//FIGURE 5
binscatter vwo entrtot if cohort==1977, discrete name(vwo77) linetype(none)
binscatter vwo entrtot if cohort==1983, discrete name(vwo82) linetype(none)
binscatter vwo entrtot if cohort==1989, discrete name(vwo89) linetype(none)
binscatter vwo entrtot if cohort==1993, discrete name(vwo93) linetype(none)

graph combine vwo77 vwo82 vwo89 vwo93, col(2)

//FIGURE 6
binscatter opljaren entrtot if entrtot>15 & cohort==1977, discrete name (yosA)
binscatter opljaren entrtot if entrtot>15 & cohort==1983, discrete name (yosB)
binscatter opljaren entrtot if entrtot>15 & cohort==1989, discrete name (yosC)
binscatter opljaren entrtot if entrtot>15 & cohort==1993, discrete name (yosD)

binscatter loon71 entrtot if entrtot>15 & cohort==1977, discrete name (loonA)
binscatter loon71 entrtot if entrtot>15 & cohort==1983, discrete name (loonB)
binscatter loon71 entrtot if entrtot>15 & cohort==1989, discrete name (loonC)
binscatter loon71 entrtot if entrtot>15 & cohort==1993, discrete name (loonD)

graph combine yosA yosB yosC yosD, col(2)
graph combine loonA loonB loonC loonD, col(2)

//FIGURE 7
binscatter x_function1977Y1 entrtot if entrtot>15 & cohort==1977, discrete name(vectorY1A)
binscatter x_function1983Y1 entrtot if entrtot>15 & cohort==1983, discrete name(vectorY1B)
binscatter x_function1989Y1 entrtot if entrtot>15 & cohort==1989, discrete name(vectorY1C)
binscatter x_function1993Y1 entrtot if entrtot>15 & cohort==1993, discrete name(vectorY1D)

binscatter x_function1977Y2 entrtot if entrtot>15 & cohort==1977, discrete name(vectorY2A)
binscatter x_function1983Y2 entrtot if entrtot>15 & cohort==1983, discrete name(vectorY2B)
binscatter x_function1989Y2 entrtot if entrtot>15 & cohort==1989, discrete name(vectorY2C)
binscatter x_function1993Y2 entrtot if entrtot>15 & cohort==1993, discrete name(vectorY2D)

graph combine vectorY1A vectorY1B vectorY1C vectorY1D, col(2)
graph combine vectorY2A vectorY2B vectorY2C vectorY2D, col(2)

******************************************************************
**PART 3: Regression analysis on main data file for results presented in the supporting material
******************************************************************

//S1 TABLE
ivreg2 opljaren (lbo = meanlboL) gebmnd_rel gr4sted gesl entrtot alloch2 I.socml parHE parLE if entrtot>=10 & entrtot<=47 & cohort==1977 & cat<4, robust cluster (schoolnr) first
ivreg2 opljaren (lbo = meanlboL) gebmnd_rel gr4sted gesl entrtot alloch2 I.socml parHE parLE if entrtot>=22 & entrtot<=48 & cohort==1983 & cat<4, robust cluster (schoolnr) first
ivreg2 opljaren (lbo = meanlboL) gebmnd_rel gr4sted gesl entrtot alloch2 I.socml parHE parLE if entrtot>=5 & entrtot<=40 & cohort==1989 & cat<4, robust cluster (schoolnr) first
ivreg2 opljaren (lbo = meanlboL) gebmnd_rel gr4sted gesl entrtot alloch2 I.socml parHE parLE if entrtot>=10 & entrtot<=40 & cohort==1993 & cat<4, robust cluster (schoolnr) first

ivreg2 opljaren (havo = meanhavoL) gebmnd_rel gr4sted gesl entrtot alloch2 I.socml parHE parLE if entrtot>=20 & entrtot<=70 & cohort==1977 & cat<4, robust cluster (schoolnr) first
ivreg2 opljaren (havo = meanhavoL) gebmnd_rel gr4sted gesl entrtot alloch2 I.socml parHE parLE if entrtot>=20 & entrtot<=60 & cohort==1983 & cat<4, robust cluster (schoolnr) first
ivreg2 opljaren (havo = meanhavoL) gebmnd_rel gr4sted gesl entrtot alloch2 I.socml parHE parLE if entrtot>=20 & entrtot<=60 & cohort==1989 & cat<4, robust cluster (schoolnr) first
ivreg2 opljaren (havo = meanhavoL) gebmnd_rel gr4sted gesl entrtot alloch2 I.socml parHE parLE if entrtot>=20 & entrtot<=60 & cohort==1993 & cat<4, robust cluster (schoolnr) first

ivreg2 opljaren (vwo = meanvwo) gebmnd_rel gr4sted gesl entrtot alloch2 I.socml parHE parLE if entrtot>=15 & entrtot<=64 & cohort==1977, robust cluster (schoolnr) first
ivreg2 opljaren (vwo = meanvwo) gebmnd_rel gr4sted gesl entrtot alloch2 I.socml parHE parLE if entrtot>=21 & entrtot<=60 & cohort==1983, robust cluster (schoolnr) first
ivreg2 opljaren (vwo = meanvwo) gebmnd_rel gr4sted gesl entrtot alloch2 I.socml parHE parLE if entrtot>=20 & entrtot<=53 & cohort==1989, robust cluster (schoolnr) first
ivreg2 opljaren (vwo = meanvwoLL) gebmnd_rel gr4sted gesl entrtot alloch2 I.socml parHE parLE if entrtot>=10 & entrtot<=60 & cohort==1993 & cat>2, robust cluster (schoolnr) first


ivreg2 loon71 (lbo = meanlboL) gebmnd_rel gr4sted gesl entrtot alloch2 I.socml parHE parLE if entrtot>=12 & entrtot<=59 & cohort==1977 & cat<4 & loon71>log(1300), robust cluster (schoolnr) first
ivreg2 loon71 (lbo = meanlboL) gebmnd_rel gr4sted gesl entrtot alloch2 I.socml parHE parLE if entrtot>=15 & entrtot<=55 & cohort==1983 & cat<4 & loon71>log(1300), robust cluster (schoolnr)  first
ivreg2 loon71 (lbo = meanlboL) gebmnd_rel gr4sted gesl entrtot alloch2 I.socml parHE parLE if entrtot>=19 & entrtot<=55 & cohort==1989 & cat<4 & loon71>log(1300), robust cluster (schoolnr) first

ivreg2 loon71 (havo = meanhavoL) gebmnd_rel gr4sted gesl entrtot alloch2 I.socml parHE parLE if entrtot>=20 & entrtot<=70 & cohort==1977 & cat<4 & loon71>log(1300), robust cluster (schoolnr) first
ivreg2 loon71 (havo = meanhavoL) gebmnd_rel gr4sted gesl entrtot alloch2 I.socml parHE parLE if entrtot>=20 & entrtot<=60 & cohort==1983 & cat<4 & loon71>log(1300), robust cluster (schoolnr) first
ivreg2 loon71 (havo = meanhavoL) gebmnd_rel gr4sted gesl entrtot alloch2 I.socml parHE parLE if entrtot>=20 & entrtot<=60 & cohort==1989 & cat<4 & loon71>log(1300), robust cluster (schoolnr) first

ivreg2 loon71 (vwo = meanvwo) gebmnd_rel gr4sted gesl entrtot alloch2 I.socml parHE parLE if entrtot>=15 & entrtot<=64 & cohort==1977 & loon71>log(1300), robust cluster (schoolnr) first
ivreg2 loon71 (vwo = meanvwo) gebmnd_rel gr4sted gesl entrtot alloch2 I.socml parHE parLE if entrtot>=21 & entrtot<=60 & cohort==1983 & loon71>log(1300), robust cluster (schoolnr) first
ivreg2 loon71 (vwo = meanvwo) gebmnd_rel gr4sted gesl entrtot alloch2 I.socml parHE parLE if entrtot>=20 & entrtot<=35 & cohort==1989 & loon71>log(1300), robust cluster (schoolnr) first

//S2 AND S3 TABLES

ivreg2 opljaren (lbo = meanlboL) gebmnd_rel gr4sted gesl entrtot alloch2 I.socml parHE parLE if entrtot>=10 & entrtot<=47 & cohort==1977 & cat<4, robust cluster (schoolnr)
ivreg2 opljaren (lbo = meanlboL) gebmnd_rel gr4sted gesl entrtot alloch2 I.socml parHE parLE if entrtot>=5 & entrtot<=47 & cohort==1977 & cat<4, robust cluster (schoolnr)
ivreg2 opljaren (lbo = meanlboL) gebmnd_rel gr4sted gesl entrtot alloch2 I.socml parHE parLE if entrtot>=15 & entrtot<=47 & cohort==1977 & cat<4, robust cluster (schoolnr)
ivreg2 opljaren (lbo = meanlboL) gebmnd_rel gr4sted gesl entrtot alloch2 I.socml parHE parLE if entrtot>=20 & entrtot<=47 & cohort==1977 & cat<4, robust cluster (schoolnr)
ivreg2 opljaren (lbo = meanlboL) gebmnd_rel gr4sted gesl entrtot alloch2 I.socml parHE parLE if entrtot>=10 & entrtot<=42 & cohort==1977 & cat<4, robust cluster (schoolnr)
ivreg2 opljaren (lbo = meanlboL) gebmnd_rel gr4sted gesl entrtot alloch2 I.socml parHE parLE if entrtot>=10 & entrtot<=37 & cohort==1977 & cat<4, robust cluster (schoolnr)
ivreg2 opljaren (lbo = meanlboL) gebmnd_rel gr4sted gesl entrtot alloch2 I.socml parHE parLE if entrtot>=10 & entrtot<=52 & cohort==1977 & cat<4, robust cluster (schoolnr)
ivreg2 opljaren (lbo = meanlboL) gebmnd_rel gr4sted gesl entrtot alloch2 I.socml parHE parLE if entrtot>=10 & entrtot<=57 & cohort==1977 & cat<4, robust cluster (schoolnr)

ivreg2 opljaren (lbo = meanlboL) gebmnd_rel gr4sted gesl entrtot alloch2 I.socml parHE parLE if entrtot>=22 & entrtot<=48 & cohort==1983 & cat<4, robust cluster (schoolnr)
ivreg2 opljaren (lbo = meanlboL) gebmnd_rel gr4sted gesl entrtot alloch2 I.socml parHE parLE if entrtot>=17 & entrtot<=48 & cohort==1983 & cat<4, robust cluster (schoolnr)
ivreg2 opljaren (lbo = meanlboL) gebmnd_rel gr4sted gesl entrtot alloch2 I.socml parHE parLE if entrtot>=27 & entrtot<=48 & cohort==1983 & cat<4, robust cluster (schoolnr)
ivreg2 opljaren (lbo = meanlboL) gebmnd_rel gr4sted gesl entrtot alloch2 I.socml parHE parLE if entrtot>=32 & entrtot<=48 & cohort==1983 & cat<4, robust cluster (schoolnr)
ivreg2 opljaren (lbo = meanlboL) gebmnd_rel gr4sted gesl entrtot alloch2 I.socml parHE parLE if entrtot>=22 & entrtot<=43 & cohort==1983 & cat<4, robust cluster (schoolnr)
ivreg2 opljaren (lbo = meanlboL) gebmnd_rel gr4sted gesl entrtot alloch2 I.socml parHE parLE if entrtot>=22 & entrtot<=38 & cohort==1983 & cat<4, robust cluster (schoolnr)
ivreg2 opljaren (lbo = meanlboL) gebmnd_rel gr4sted gesl entrtot alloch2 I.socml parHE parLE if entrtot>=22 & entrtot<=53 & cohort==1983 & cat<4, robust cluster (schoolnr)
ivreg2 opljaren (lbo = meanlboL) gebmnd_rel gr4sted gesl entrtot alloch2 I.socml parHE parLE if entrtot>=22 & entrtot<=58 & cohort==1983 & cat<4, robust cluster (schoolnr)


ivreg2 loon71 (lbo = meanlboL) gebmnd_rel gr4sted gesl entrtot alloch2 I.socml parHE parLE if entrtot>=12 & entrtot<=59 & cohort==1977 & cat<4 & loon71>log(1300), robust cluster (schoolnr)
ivreg2 loon71 (lbo = meanlboL) gebmnd_rel gr4sted gesl entrtot alloch2 I.socml parHE parLE if entrtot>=7 & entrtot<=59 & cohort==1977 & cat<4 & loon71>log(1300), robust cluster (schoolnr)
ivreg2 loon71 (lbo = meanlboL) gebmnd_rel gr4sted gesl entrtot alloch2 I.socml parHE parLE if entrtot>=17 & entrtot<=59 & cohort==1977 & cat<4 & loon71>log(1300), robust cluster (schoolnr)
ivreg2 loon71 (lbo = meanlboL) gebmnd_rel gr4sted gesl entrtot alloch2 I.socml parHE parLE if entrtot>=22 & entrtot<=59 & cohort==1977 & cat<4 & loon71>log(1300), robust cluster (schoolnr)
ivreg2 loon71 (lbo = meanlboL) gebmnd_rel gr4sted gesl entrtot alloch2 I.socml parHE parLE if entrtot>=27 & entrtot<=59 & cohort==1977 & cat<4 & loon71>log(1300), robust cluster (schoolnr)
ivreg2 loon71 (lbo = meanlboL) gebmnd_rel gr4sted gesl entrtot alloch2 I.socml parHE parLE if entrtot>=12 & entrtot<=54 & cohort==1977 & cat<4 & loon71>log(1300), robust cluster (schoolnr)
ivreg2 loon71 (lbo = meanlboL) gebmnd_rel gr4sted gesl entrtot alloch2 I.socml parHE parLE if entrtot>=12 & entrtot<=49 & cohort==1977 & cat<4 & loon71>log(1300), robust cluster (schoolnr)
ivreg2 loon71 (lbo = meanlboL) gebmnd_rel gr4sted gesl entrtot alloch2 I.socml parHE parLE if entrtot>=12 & entrtot<=64 & cohort==1977 & cat<4 & loon71>log(1300), robust cluster (schoolnr)
ivreg2 loon71 (lbo = meanlboL) gebmnd_rel gr4sted gesl entrtot alloch2 I.socml parHE parLE if entrtot>=12 & entrtot<=69 & cohort==1977 & cat<4 & loon71>log(1300), robust cluster (schoolnr)

ivreg2 loon71 (lbo = meanlboL) gebmnd_rel gr4sted gesl entrtot alloch2 I.socml parHE parLE if entrtot>=15 & entrtot<=55 & cohort==1983 & cat<4 & loon71>log(1300), robust cluster (schoolnr)
ivreg2 loon71 (lbo = meanlboL) gebmnd_rel gr4sted gesl entrtot alloch2 I.socml parHE parLE if entrtot>=10 & entrtot<=55 & cohort==1983 & cat<4 & loon71>log(1300), robust cluster (schoolnr)
ivreg2 loon71 (lbo = meanlboL) gebmnd_rel gr4sted gesl entrtot alloch2 I.socml parHE parLE if entrtot>=20 & entrtot<=55 & cohort==1983 & cat<4 & loon71>log(1300), robust cluster (schoolnr)
ivreg2 loon71 (lbo = meanlboL) gebmnd_rel gr4sted gesl entrtot alloch2 I.socml parHE parLE if entrtot>=25 & entrtot<=55 & cohort==1983 & cat<4 & loon71>log(1300), robust cluster (schoolnr)
ivreg2 loon71 (lbo = meanlboL) gebmnd_rel gr4sted gesl entrtot alloch2 I.socml parHE parLE if entrtot>=15 & entrtot<=50 & cohort==1983 & cat<4 & loon71>log(1300), robust cluster (schoolnr)
ivreg2 loon71 (lbo = meanlboL) gebmnd_rel gr4sted gesl entrtot alloch2 I.socml parHE parLE if entrtot>=15 & entrtot<=45 & cohort==1983 & cat<4 & loon71>log(1300), robust cluster (schoolnr)
ivreg2 loon71 (lbo = meanlboL) gebmnd_rel gr4sted gesl entrtot alloch2 I.socml parHE parLE if entrtot>=15 & entrtot<=60 & cohort==1983 & cat<4 & loon71>log(1300), robust cluster (schoolnr)


ivreg2 opljaren (havo = meanhavoL) gebmnd_rel gr4sted gesl entrtot alloch2 I.socml parHE parLE if entrtot>=33 & entrtot<=70 & cohort==1977 & cat<4, robust cluster (schoolnr)
ivreg2 opljaren (havo = meanhavoL) gebmnd_rel gr4sted gesl entrtot alloch2 I.socml parHE parLE if entrtot>=28 & entrtot<=70 & cohort==1977 & cat<4, robust cluster (schoolnr)
ivreg2 opljaren (havo = meanhavoL) gebmnd_rel gr4sted gesl entrtot alloch2 I.socml parHE parLE if entrtot>=23 & entrtot<=70 & cohort==1977 & cat<4, robust cluster (schoolnr)
ivreg2 opljaren (havo = meanhavoL) gebmnd_rel gr4sted gesl entrtot alloch2 I.socml parHE parLE if entrtot>=38 & entrtot<=70 & cohort==1977 & cat<4, robust cluster (schoolnr)
ivreg2 opljaren (havo = meanhavoL) gebmnd_rel gr4sted gesl entrtot alloch2 I.socml parHE parLE if entrtot>=43 & entrtot<=70 & cohort==1977 & cat<4, robust cluster (schoolnr)
ivreg2 opljaren (havo = meanhavoL) gebmnd_rel gr4sted gesl entrtot alloch2 I.socml parHE parLE if entrtot>=33 & entrtot<=65 & cohort==1977 & cat<4, robust cluster (schoolnr)
ivreg2 opljaren (havo = meanhavoL) gebmnd_rel gr4sted gesl entrtot alloch2 I.socml parHE parLE if entrtot>=33 & entrtot<=60 & cohort==1977 & cat<4, robust cluster (schoolnr)
ivreg2 opljaren (havo = meanhavoL) gebmnd_rel gr4sted gesl entrtot alloch2 I.socml parHE parLE if entrtot>=33 & entrtot<=55 & cohort==1977 & cat<4, robust cluster (schoolnr)

ivreg2 opljaren (havo = meanhavoL) gebmnd_rel gr4sted gesl entrtot alloch2 I.socml parHE parLE if entrtot>=26 & entrtot<=60 & cohort==1983 & cat<4, robust cluster (schoolnr)
ivreg2 opljaren (havo = meanhavoL) gebmnd_rel gr4sted gesl entrtot alloch2 I.socml parHE parLE if entrtot>=21 & entrtot<=60 & cohort==1983 & cat<4, robust cluster (schoolnr)
ivreg2 opljaren (havo = meanhavoL) gebmnd_rel gr4sted gesl entrtot alloch2 I.socml parHE parLE if entrtot>=16 & entrtot<=60 & cohort==1983 & cat<4, robust cluster (schoolnr)
ivreg2 opljaren (havo = meanhavoL) gebmnd_rel gr4sted gesl entrtot alloch2 I.socml parHE parLE if entrtot>=31 & entrtot<=60 & cohort==1983 & cat<4, robust cluster (schoolnr)
ivreg2 opljaren (havo = meanhavoL) gebmnd_rel gr4sted gesl entrtot alloch2 I.socml parHE parLE if entrtot>=36 & entrtot<=60 & cohort==1983 & cat<4, robust cluster (schoolnr)
ivreg2 opljaren (havo = meanhavoL) gebmnd_rel gr4sted gesl entrtot alloch2 I.socml parHE parLE if entrtot>=26 & entrtot<=55 & cohort==1983 & cat<4, robust cluster (schoolnr)
ivreg2 opljaren (havo = meanhavoL) gebmnd_rel gr4sted gesl entrtot alloch2 I.socml parHE parLE if entrtot>=26 & entrtot<=50 & cohort==1983 & cat<4, robust cluster (schoolnr)
ivreg2 opljaren (havo = meanhavoL) gebmnd_rel gr4sted gesl entrtot alloch2 I.socml parHE parLE if entrtot>=26 & entrtot<=45 & cohort==1983 & cat<4, robust cluster (schoolnr)


ivreg2 loon71 (havo = meanhavoL) gebmnd_rel gr4sted gesl entrtot alloch2 I.socml parHE parLE if entrtot>=20 & entrtot<=70 & cohort==1977 & cat<4 & loon71>log(1300), robust cluster (schoolnr)
ivreg2 loon71 (havo = meanhavoL) gebmnd_rel gr4sted gesl entrtot alloch2 I.socml parHE parLE if entrtot>=15 & entrtot<=70 & cohort==1977 & cat<4 & loon71>log(1300), robust cluster (schoolnr)
ivreg2 loon71 (havo = meanhavoL) gebmnd_rel gr4sted gesl entrtot alloch2 I.socml parHE parLE if entrtot>=10 & entrtot<=70 & cohort==1977 & cat<4 & loon71>log(1300), robust cluster (schoolnr)
ivreg2 loon71 (havo = meanhavoL) gebmnd_rel gr4sted gesl entrtot alloch2 I.socml parHE parLE if entrtot>=25 & entrtot<=70 & cohort==1977 & cat<4 & loon71>log(1300), robust cluster (schoolnr)
ivreg2 loon71 (havo = meanhavoL) gebmnd_rel gr4sted gesl entrtot alloch2 I.socml parHE parLE if entrtot>=30 & entrtot<=70 & cohort==1977 & cat<4 & loon71>log(1300), robust cluster (schoolnr)
ivreg2 loon71 (havo = meanhavoL) gebmnd_rel gr4sted gesl entrtot alloch2 I.socml parHE parLE if entrtot>=20 & entrtot<=65 & cohort==1977 & cat<4 & loon71>log(1300), robust cluster (schoolnr)
ivreg2 loon71 (havo = meanhavoL) gebmnd_rel gr4sted gesl entrtot alloch2 I.socml parHE parLE if entrtot>=20 & entrtot<=60 & cohort==1977 & cat<4 & loon71>log(1300), robust cluster (schoolnr)
ivreg2 loon71 (havo = meanhavoL) gebmnd_rel gr4sted gesl entrtot alloch2 I.socml parHE parLE if entrtot>=20 & entrtot<=55 & cohort==1977 & cat<4 & loon71>log(1300), robust cluster (schoolnr)

ivreg2 loon71 (havo = meanhavoL) gebmnd_rel gr4sted gesl entrtot alloch2 I.socml parHE parLE if entrtot>=25 & entrtot<=60 & cohort==1983 & cat<4 & loon71>log(1300), robust cluster (schoolnr)
ivreg2 loon71 (havo = meanhavoL) gebmnd_rel gr4sted gesl entrtot alloch2 I.socml parHE parLE if entrtot>=20 & entrtot<=60 & cohort==1983 & cat<4 & loon71>log(1300), robust cluster (schoolnr)
ivreg2 loon71 (havo = meanhavoL) gebmnd_rel gr4sted gesl entrtot alloch2 I.socml parHE parLE if entrtot>=15 & entrtot<=60 & cohort==1983 & cat<4 & loon71>log(1300), robust cluster (schoolnr)
ivreg2 loon71 (havo = meanhavoL) gebmnd_rel gr4sted gesl entrtot alloch2 I.socml parHE parLE if entrtot>=30 & entrtot<=60 & cohort==1983 & cat<4 & loon71>log(1300), robust cluster (schoolnr)
ivreg2 loon71 (havo = meanhavoL) gebmnd_rel gr4sted gesl entrtot alloch2 I.socml parHE parLE if entrtot>=35 & entrtot<=60 & cohort==1983 & cat<4 & loon71>log(1300), robust cluster (schoolnr)
ivreg2 loon71 (havo = meanhavoL) gebmnd_rel gr4sted gesl entrtot alloch2 I.socml parHE parLE if entrtot>=25 & entrtot<=55 & cohort==1983 & cat<4 & loon71>log(1300), robust cluster (schoolnr)
ivreg2 loon71 (havo = meanhavoL) gebmnd_rel gr4sted gesl entrtot alloch2 I.socml parHE parLE if entrtot>=25 & entrtot<=50 & cohort==1983 & cat<4 & loon71>log(1300), robust cluster (schoolnr)
ivreg2 loon71 (havo = meanhavoL) gebmnd_rel gr4sted gesl entrtot alloch2 I.socml parHE parLE if entrtot>=25 & entrtot<=45 & cohort==1983 & cat<4 & loon71>log(1300), robust cluster (schoolnr)


ivreg2 opljaren (vwo = meanvwo) gebmnd_rel gr4sted gesl entrtot alloch2 I.socml parHE parLE if entrtot>=15 & entrtot<=64 & cohort==1977, robust cluster (schoolnr)
ivreg2 opljaren (vwo = meanvwo) gebmnd_rel gr4sted gesl entrtot alloch2 I.socml parHE parLE if entrtot>=5 & entrtot<=64 & cohort==1977, robust cluster (schoolnr)
ivreg2 opljaren (vwo = meanvwo) gebmnd_rel gr4sted gesl entrtot alloch2 I.socml parHE parLE if entrtot>=20 & entrtot<=64 & cohort==1977, robust cluster (schoolnr)
ivreg2 opljaren (vwo = meanvwo) gebmnd_rel gr4sted gesl entrtot alloch2 I.socml parHE parLE if entrtot>=25 & entrtot<=64 & cohort==1977, robust cluster (schoolnr)
ivreg2 opljaren (vwo = meanvwo) gebmnd_rel gr4sted gesl entrtot alloch2 I.socml parHE parLE if entrtot>=30 & entrtot<=64 & cohort==1977, robust cluster (schoolnr)
ivreg2 opljaren (vwo = meanvwo) gebmnd_rel gr4sted gesl entrtot alloch2 I.socml parHE parLE if entrtot>=15 & entrtot<=59 & cohort==1977, robust cluster (schoolnr)
ivreg2 opljaren (vwo = meanvwo) gebmnd_rel gr4sted gesl entrtot alloch2 I.socml parHE parLE if entrtot>=15 & entrtot<=54 & cohort==1977, robust cluster (schoolnr)
ivreg2 opljaren (vwo = meanvwo) gebmnd_rel gr4sted gesl entrtot alloch2 I.socml parHE parLE if entrtot>=15 & entrtot<=69 & cohort==1977, robust cluster (schoolnr)

ivreg2 opljaren (vwo = meanvwo) gebmnd_rel gr4sted gesl entrtot alloch2 I.socml parHE parLE if entrtot>=21 & entrtot<=60 & cohort==1983, robust cluster (schoolnr)
ivreg2 opljaren (vwo = meanvwo) gebmnd_rel gr4sted gesl entrtot alloch2 I.socml parHE parLE if entrtot>=11 & entrtot<=60 & cohort==1983, robust cluster (schoolnr)
ivreg2 opljaren (vwo = meanvwo) gebmnd_rel gr4sted gesl entrtot alloch2 I.socml parHE parLE if entrtot>=26 & entrtot<=60 & cohort==1983, robust cluster (schoolnr)
ivreg2 opljaren (vwo = meanvwo) gebmnd_rel gr4sted gesl entrtot alloch2 I.socml parHE parLE if entrtot>=31 & entrtot<=60 & cohort==1983, robust cluster (schoolnr)
ivreg2 opljaren (vwo = meanvwo) gebmnd_rel gr4sted gesl entrtot alloch2 I.socml parHE parLE if entrtot>=36 & entrtot<=60 & cohort==1983, robust cluster (schoolnr)
ivreg2 opljaren (vwo = meanvwo) gebmnd_rel gr4sted gesl entrtot alloch2 I.socml parHE parLE if entrtot>=21 & entrtot<=55 & cohort==1983, robust cluster (schoolnr)
ivreg2 opljaren (vwo = meanvwo) gebmnd_rel gr4sted gesl entrtot alloch2 I.socml parHE parLE if entrtot>=21 & entrtot<=50 & cohort==1983, robust cluster (schoolnr)


ivreg2 loon71 (vwo = meanvwo) gebmnd_rel gr4sted gesl entrtot alloch2 I.socml parHE parLE if entrtot>=15 & entrtot<=64 & cohort==1977 & loon71>log(1300), robust cluster (schoolnr)
ivreg2 loon71 (vwo = meanvwo) gebmnd_rel gr4sted gesl entrtot alloch2 I.socml parHE parLE if entrtot>=5 & entrtot<=64 & cohort==1977 & loon71>log(1300), robust cluster (schoolnr)
ivreg2 loon71 (vwo = meanvwo) gebmnd_rel gr4sted gesl entrtot alloch2 I.socml parHE parLE if entrtot>=20 & entrtot<=64 & cohort==1977 & loon71>log(1300), robust cluster (schoolnr)
ivreg2 loon71 (vwo = meanvwo) gebmnd_rel gr4sted gesl entrtot alloch2 I.socml parHE parLE if entrtot>=25 & entrtot<=64 & cohort==1977 & loon71>log(1300), robust cluster (schoolnr)
ivreg2 loon71 (vwo = meanvwo) gebmnd_rel gr4sted gesl entrtot alloch2 I.socml parHE parLE if entrtot>=30 & entrtot<=64 & cohort==1977 & loon71>log(1300), robust cluster (schoolnr)
ivreg2 loon71 (vwo = meanvwo) gebmnd_rel gr4sted gesl entrtot alloch2 I.socml parHE parLE if entrtot>=15 & entrtot<=59 & cohort==1977 & loon71>log(1300), robust cluster (schoolnr)
ivreg2 loon71 (vwo = meanvwo) gebmnd_rel gr4sted gesl entrtot alloch2 I.socml parHE parLE if entrtot>=15 & entrtot<=54 & cohort==1977 & loon71>log(1300), robust cluster (schoolnr)
ivreg2 loon71 (vwo = meanvwo) gebmnd_rel gr4sted gesl entrtot alloch2 I.socml parHE parLE if entrtot>=15 & entrtot<=69 & cohort==1977 & loon71>log(1300), robust cluster (schoolnr)

ivreg2 loon71 (vwo = meanvwo) gebmnd_rel gr4sted gesl entrtot alloch2 I.socml parHE parLE if entrtot>=21 & entrtot<=60 & cohort==1983 & loon71>log(1300), robust cluster (schoolnr)
ivreg2 loon71 (vwo = meanvwo) gebmnd_rel gr4sted gesl entrtot alloch2 I.socml parHE parLE if entrtot>=11 & entrtot<=60 & cohort==1983 & loon71>log(1300), robust cluster (schoolnr)
ivreg2 loon71 (vwo = meanvwo) gebmnd_rel gr4sted gesl entrtot alloch2 I.socml parHE parLE if entrtot>=26 & entrtot<=60 & cohort==1983 & loon71>log(1300), robust cluster (schoolnr)
ivreg2 loon71 (vwo = meanvwo) gebmnd_rel gr4sted gesl entrtot alloch2 I.socml parHE parLE if entrtot>=31 & entrtot<=60 & cohort==1983 & loon71>log(1300), robust cluster (schoolnr)
ivreg2 loon71 (vwo = meanvwo) gebmnd_rel gr4sted gesl entrtot alloch2 I.socml parHE parLE if entrtot>=36 & entrtot<=60 & cohort==1983 & loon71>log(1300), robust cluster (schoolnr)
ivreg2 loon71 (vwo = meanvwo) gebmnd_rel gr4sted gesl entrtot alloch2 I.socml parHE parLE if entrtot>=21 & entrtot<=55 & cohort==1983 & loon71>log(1300), robust cluster (schoolnr)
ivreg2 loon71 (vwo = meanvwo) gebmnd_rel gr4sted gesl entrtot alloch2 I.socml parHE parLE if entrtot>=21 & entrtot<=50 & cohort==1983 & loon71>log(1300), robust cluster (schoolnr)

//S4 TABLE: applies to separate VOCL 1999 file and is listed further below

//S5 TABLE
local sectors "sector1 sector2 sector3"

foreach x of local sectors {
ivreg2 "`x'" (lbo = meanlboL) gebmnd_rel gr4sted gesl entrtot alloch2 I.socml parHE parLE if entrtot>=12 & entrtot<=59 & cohort==1977 & cat<4, robust cluster (schoolnr)
estimates store sectorlbo77`x'
}
di e(N)
estimates table sectorlbo77*, se p keep(lbo)

local sectors "sector1 sector2 sector3"

foreach x of local sectors {
ivreg2 "`x'" (lbo = meanlboL) gebmnd_rel gr4sted gesl entrtot alloch2 I.socml parHE parLE if entrtot>=15 & entrtot<=45 & cohort==1983 & cat<4, robust cluster (schoolnr)
estimates store sectorlbo82`x'
}
di e(N)
estimates table sectorlbo82*, se p keep(lbo)

local sectors "sector1 sector2 sector3"

foreach x of local sectors {
ivreg2 "`x'" (lbo = meanlboL) gebmnd_rel gr4sted gesl entrtot alloch2 I.socml parHE parLE if entrtot>=19 & entrtot<=45 & cohort==1989 & cat<4, robust cluster (schoolnr)
estimates store sectorlbo89`x'
}
di e(N)
estimates table sectorlbo89*, se p keep(lbo)


local sectors "sector1 sector2 sector3"

foreach x of local sectors {
xi: ivreg "`x'" (havo = meanhavoL) entrtot gebmnd_rel gr4sted  gesl alloch2 I.socml parHE parLE if entrtot>=33 & entrtot<=70 & cat<4 & cohort==1977, robust cluster (schoolnr)
estimates store sectorhavo77`x'
}
di e(N)
estimates table sectorhavo77*, se p keep(havo)

local sectors "sector1 sector2 sector3"

foreach x of local sectors {
xi: ivreg "`x'" (havo = meanhavoL) entrtot gebmnd_rel gr4sted  gesl alloch2 I.socml parHE parLE if entrtot>=15 & entrtot<=50 & cat<4 & cohort==1983, robust cluster (schoolnr)
estimates store sectorhavo82`x'
}
di e(N)
estimates table sectorhavo82*, se p keep(havo)

local sectors "sector1 sector2 sector3"

foreach x of local sectors {
xi: ivreg "`x'" (havo = meanhavoL) entrtot gebmnd_rel gr4sted  gesl alloch2 I.socml parHE parLE if entrtot>=25 & entrtot<=60 & cat<4 & cohort==1989, robust cluster (schoolnr)
estimates store sectorhavo89`x'
}
di e(N)
estimates table sectorhavo89*, se p keep(havo)


local sectors "sector1A sector2A sector3A"

foreach x of local sectors {
xi: ivreg "`x'" (vwo = meanvwo) entrtot gebmnd_rel gr4sted  gesl alloch2 I.socml parHE parLE if entrtot>=15 & entrtot<=64 & cohort==1977, robust cluster (schoolnr)
estimates store sectorvwo77`x'
}
di e(N)
estimates table sectorvwo77*, se p keep(vwo)

local sectors "sector1A sector2A sector3A"

foreach x of local sectors {
xi: ivreg "`x'" (vwo = meanvwo) entrtot gebmnd_rel gr4sted  gesl alloch2 I.socml parHE parLE if entrtot>=21 & entrtot<=60 & cohort==1983, robust cluster (schoolnr)
estimates store sectorvwo82`x'
}
di e(N)
estimates table sectorvwo82*, se p keep(vwo)

local sectors "sector1A sector2A sector3A"

foreach x of local sectors {
xi: ivreg "`x'" (vwo = meanvwo) entrtot gebmnd_rel gr4sted  gesl alloch2 I.socml parHE parLE if entrtot>=20 & entrtot<=53 & cohort==1989, robust cluster (schoolnr)
estimates store sectorvwo89`x'
}
di e(N)
estimates table sectorvwo89*, se p keep(vwo)

//S6 TABLE
ivreg2 opljaren (lbo = logit_lboY1) gebmnd_rel gr4sted gesl entrtot alloch2 I.socml parHE parLE if entrtot>=10 & entrtot<=47 & cohort==1977 & cat<4, robust cluster (schoolnr)
ivreg2 opljaren (lbo = logit_lboY1) gebmnd_rel gr4sted gesl entrtot alloch2 I.socml parHE parLE if entrtot>=22 & entrtot<=48 & cohort==1983 & cat<4, robust cluster (schoolnr)
ivreg2 opljaren (lbo = logit_lboY1) gebmnd_rel gr4sted gesl entrtot alloch2 I.socml parHE parLE if entrtot>=5 & entrtot<=40 & cohort==1989 & cat<4, robust cluster (schoolnr)
ivreg2 opljaren (lbo = logit_lboY1) gebmnd_rel gr4sted gesl entrtot alloch2 I.socml parHE parLE if entrtot>=10 & entrtot<=40 & cohort==1993 & cat<4, robust cluster (schoolnr)

ivreg2 opljaren (havo = logit_havoY1) gebmnd_rel gr4sted gesl entrtot alloch2 I.socml parHE parLE if entrtot>=33 & entrtot<=70 & cohort==1977 & cat<4, robust cluster (schoolnr)
ivreg2 opljaren (havo = logit_havoY1) gebmnd_rel gr4sted gesl entrtot alloch2 I.socml parHE parLE if entrtot>=26 & entrtot<=60 & cohort==1983 & cat<4, robust cluster (schoolnr)
ivreg2 opljaren (havo = logit_havoY1) gebmnd_rel gr4sted gesl entrtot alloch2 I.socml parHE parLE if entrtot>=32 & entrtot<=60 & cohort==1989 & cat<4, robust cluster (schoolnr)
ivreg2 opljaren (havo = logit_havoY1) gebmnd_rel gr4sted gesl entrtot alloch2 I.socml parHE parLE if entrtot>=28 & entrtot<=60 & cohort==1993 & cat<4, robust cluster (schoolnr)

ivreg2 opljaren (vwo = logit_vwoY1) gebmnd_rel gr4sted gesl entrtot alloch2 I.socml parHE parLE if entrtot>=15 & entrtot<=64 & cohort==1977, robust cluster (schoolnr)
ivreg2 opljaren (vwo = logit_vwoY1) gebmnd_rel gr4sted gesl entrtot alloch2 I.socml parHE parLE if entrtot>=21 & entrtot<=60 & cohort==1983, robust cluster (schoolnr)
ivreg2 opljaren (vwo = logit_vwoY1) gebmnd_rel gr4sted gesl entrtot alloch2 I.socml parHE parLE if entrtot>=20 & entrtot<=53 & cohort==1989, robust cluster (schoolnr)
ivreg2 opljaren (vwo = logit_vwoY1) gebmnd_rel gr4sted gesl entrtot alloch2 I.socml parHE parLE if entrtot>=10 & entrtot<=60 & cohort==1993 & cat>2, robust cluster (schoolnr)


ivreg2 loon71 (lbo = logit_lboY2) gebmnd_rel gr4sted gesl entrtot alloch2 I.socml parHE parLE if entrtot>=12 & entrtot<=59 & cohort==1977 & cat<4 & loon71>log(1300), robust cluster (schoolnr)
ivreg2 loon71 (lbo = logit_lboY2) gebmnd_rel gr4sted gesl entrtot alloch2 I.socml parHE parLE if entrtot>=15 & entrtot<=55 & cohort==1983 & cat<4 & loon71>log(1300), robust cluster (schoolnr)
ivreg2 loon71 (lbo = logit_lboY2) gebmnd_rel gr4sted gesl entrtot alloch2 I.socml parHE parLE if entrtot>=19 & entrtot<=55 & cohort==1989 & cat<4 & loon71>log(1300), robust cluster (schoolnr)

ivreg2 loon71 (havo = logit_havoY2) gebmnd_rel gr4sted gesl entrtot alloch2 I.socml parHE parLE if entrtot>=20 & entrtot<=70 & cohort==1977 & cat<4 & loon71>log(1300), robust cluster (schoolnr)
ivreg2 loon71 (havo = logit_havoY2) gebmnd_rel gr4sted gesl entrtot alloch2 I.socml parHE parLE if entrtot>=25 & entrtot<=60 & cohort==1983 & cat<4 & loon71>log(1300), robust cluster (schoolnr)
ivreg2 loon71 (havo = logit_havoY2) gebmnd_rel gr4sted gesl entrtot alloch2 I.socml parHE parLE if entrtot>=20 & entrtot<=60 & cohort==1989 & cat<4 & loon71>log(1300), robust cluster (schoolnr)

ivreg2 loon71 (vwo = logit_vwoY2) gebmnd_rel gr4sted gesl entrtot alloch2 I.socml parHE parLE if entrtot>=15 & entrtot<=64 & cohort==1977 & loon71>log(1300), robust cluster (schoolnr)
ivreg2 loon71 (vwo = logit_vwoY2) gebmnd_rel gr4sted gesl entrtot alloch2 I.socml parHE parLE if entrtot>=21 & entrtot<=60 & cohort==1983 & loon71>log(1300), robust cluster (schoolnr)
ivreg2 loon71 (vwo = logit_vwoY2) gebmnd_rel gr4sted gesl entrtot alloch2 I.socml parHE parLE if entrtot>=20 & entrtot<=53 & cohort==1989 & loon71>log(1300), robust cluster (schoolnr)


//S7 TABLE
ivreg2 x_function1977Y1 (lbo = meanlboL) entrtot if entrtot>=10 & entrtot<=47 & cohort==1977 & cat<4, robust cluster (schoolnr)
ivreg2 x_function1983Y1 (lbo = meanlboL) entrtot if entrtot>=22 & entrtot<=48 & cohort==1983 & cat<4, robust cluster (schoolnr)
ivreg2 x_function1989Y1 (lbo = meanlboL) entrtot if entrtot>=5 & entrtot<=40 & cohort==1989 & cat<4, robust cluster (schoolnr)
ivreg2 x_function1993Y1 (lbo = meanlboL) entrtot if entrtot>=10 & entrtot<=40 & cohort==1993 & cat<3, robust cluster (schoolnr)

ivreg2 x_function1977Y1 (havo = meanhavoL) entrtot if entrtot>=33 & entrtot<=70 & cohort==1977 & cat<4, robust cluster (schoolnr)
ivreg2 x_function1983Y1 (havo = meanhavoL) entrtot if entrtot>=26 & entrtot<=60 & cohort==1983 & cat<4, robust cluster (schoolnr)
ivreg2 x_function1989Y1 (havo = meanhavoL) entrtot if entrtot>=32 & entrtot<=60 & cohort==1989 & cat<4, robust cluster (schoolnr)
ivreg2 x_function1993Y1 (havo = meanhavoL) entrtot if entrtot>=28 & entrtot<=60 & cohort==1993 & cat<4, robust cluster (schoolnr)

ivreg2 x_function1977Y1 (vwo = meanvwo) entrtot if entrtot>=15 & entrtot<=64 & cohort==1977, robust cluster (schoolnr)
ivreg2 x_function1983Y1 (vwo = meanvwo) entrtot if entrtot>=21 & entrtot<=60 & cohort==1983, robust cluster (schoolnr)
ivreg2 x_function1989Y1 (vwo = meanvwo) entrtot if entrtot>=20 & entrtot<=53 & cohort==1989, robust cluster (schoolnr)
ivreg2 x_function1993Y1 (vwo = meanvwoLL) entrtot if entrtot>=10 & entrtot<=60 & cohort==1993 & cat>2, robust cluster (schoolnr)


ivreg2 x_function1977Y2 (lbo = meanlboL) entrtot if entrtot>=12 & entrtot<=59 & cohort==1977 & cat<4 & loon71>log(1300), robust cluster (schoolnr)
ivreg2 x_function1983Y2 (lbo = meanlboL) entrtot if entrtot>=15 & entrtot<=55 & cohort==1983 & cat<4 & loon71>log(1300), robust cluster (schoolnr)
ivreg2 x_function1989Y2 (lbo = meanlboL) entrtot if entrtot>=19 & entrtot<=55 & cohort==1989 & cat<4 & loon71>log(1300), robust cluster (schoolnr)

ivreg2 x_function1977Y2 (havo = meanhavoL) entrtot if entrtot>=20 & entrtot<=70 & cohort==1977 & cat<4 & loon71>log(1300), robust cluster (schoolnr)
ivreg2 x_function1983Y2 (havo = meanhavoL) entrtot if entrtot>=25 & entrtot<=60 & cohort==1983 & cat<4 & loon71>log(1300), robust cluster (schoolnr)
ivreg2 x_function1989Y2 (havo = meanhavoL) entrtot if entrtot>=20 & entrtot<=60 & cohort==1989 & cat<4 & loon71>log(1300), robust cluster (schoolnr)

ivreg2 x_function1977Y2 (vwo = meanvwo) entrtot if entrtot>=15 & entrtot<=64 & cohort==1977 & loon71>log(1300), robust cluster (schoolnr)
ivreg2 x_function1983Y2 (vwo = meanvwo) entrtot if entrtot>=21 & entrtot<=60 & cohort==1983 & loon71>log(1300), robust cluster (schoolnr)
ivreg2 x_function1989Y2 (vwo = meanvwo) entrtot if entrtot>=20 & entrtot<=53 & cohort==1989 & loon71>log(1300), robust cluster (schoolnr)


//S8 TABLE
//Alternative spec A1 
ivreg2 opljaren (lbo = meanlbo) gebmnd_rel gr4sted gesl entrtot alloch2 I.socml parHE parLE  if entrtot>=10 & entrtot<=44 & cohort==1977, robust cluster (schoolnr)
ivreg2 opljaren (lbo = meanlbo) gebmnd_rel gr4sted gesl entrtot alloch2 I.socml parHE parLE  if entrtot>=10 & entrtot<=42 & cohort==1983, robust cluster (schoolnr)
ivreg2 opljaren (lbo = meanlbo) gebmnd_rel gr4sted gesl entrtot alloch2 I.socml parHE parLE  if entrtot>=5 & entrtot<=40 & cohort==1989, robust cluster (schoolnr)
ivreg2 opljaren (lbo = meanlbo) gebmnd_rel gr4sted gesl entrtot alloch2 I.socml parHE parLE  if entrtot>=10 & entrtot<=40 & cohort==1993, robust cluster (schoolnr)

ivreg2 opljaren (mavo = meanmavoL) gebmnd_rel gr4sted gesl entrtot alloch2 I.socml parHE parLE  if entrtot>=10 & entrtot<=46 & cohort==1977 & cat>1, robust cluster (schoolnr)
ivreg2 opljaren (mavo = meanmavoL) gebmnd_rel gr4sted gesl entrtot alloch2 I.socml parHE parLE  if entrtot>=26 & entrtot<=55 & cohort==1983 & cat>1, robust cluster (schoolnr)
ivreg2 opljaren (mavo = meanmavoL) gebmnd_rel gr4sted gesl entrtot alloch2 I.socml parHE parLE  if entrtot>=10 & entrtot<=45 & cohort==1989 & cat>1, robust cluster (schoolnr)
ivreg2 opljaren (mavo = meanmavoL) gebmnd_rel gr4sted gesl entrtot alloch2 I.socml parHE parLE  if entrtot>=10 & entrtot<=45 & cohort==1993 & cat>1, robust cluster (schoolnr)

ivreg2 opljaren (vwo = meanvwoL) gebmnd_rel gr4sted gesl entrtot alloch2 I.socml parHE parLE  if entrtot>=25 & entrtot<=70 & cohort==1977 & cat>1, robust cluster (schoolnr)
ivreg2 opljaren (vwo = meanvwoL) gebmnd_rel gr4sted gesl entrtot alloch2 I.socml parHE parLE  if entrtot>=10 & entrtot<=55 & cohort==1983 & cat>1, robust cluster (schoolnr)
ivreg2 opljaren (vwo = meanvwoL) gebmnd_rel gr4sted gesl entrtot alloch2 I.socml parHE parLE  if entrtot>=10 & entrtot<=60 & cohort==1989 & cat>1, robust cluster (schoolnr)
ivreg2 opljaren (vwo = meanvwoL) gebmnd_rel gr4sted gesl entrtot alloch2 I.socml parHE parLE  if entrtot>=20 & entrtot<=60 & cohort==1993 & cat>1, robust cluster (schoolnr)


ivreg2 loon71 (lbo = meanlbo) gebmnd_rel gr4sted gesl entrtot alloch2 I.socml parHE parLE  if entrtot>=10 & entrtot<=50 & cohort==1977 & loon71>log(1300), robust cluster (schoolnr)
ivreg2 loon71 (lbo = meanlbo) gebmnd_rel gr4sted gesl entrtot alloch2 I.socml parHE parLE  if entrtot>=10 & entrtot<=41 & cohort==1983 & loon71>log(1300), robust cluster (schoolnr)
ivreg2 loon71 (lbo = meanlbo) gebmnd_rel gr4sted gesl entrtot alloch2 I.socml parHE parLE  if entrtot>=10 & entrtot<=39 & cohort==1989 & loon71>log(1300), robust cluster (schoolnr)

ivreg2 loon71 (mavo = meanmavoL) gebmnd_rel gr4sted gesl entrtot alloch2 I.socml parHE parLE  if entrtot>=10 & entrtot<=44 & cohort==1977 & cat>1 & loon71>log(1300), robust cluster (schoolnr)
ivreg2 loon71 (mavo = meanmavoL) gebmnd_rel gr4sted gesl entrtot alloch2 I.socml parHE parLE  if entrtot>=28 & entrtot<=54 & cohort==1983 & cat>1 & loon71>log(1300), robust cluster (schoolnr)
ivreg2 loon71 (mavo = meanmavoL) gebmnd_rel gr4sted gesl entrtot alloch2 I.socml parHE parLE  if entrtot>=10 & entrtot<=53 & cohort==1989 & cat>1 & loon71>log(1300), robust cluster (schoolnr)

ivreg2 loon71 (vwo = meanvwoL) gebmnd_rel gr4sted gesl entrtot alloch2 I.socml parHE parLE  if entrtot>=25 & entrtot<=66 & cohort==1977 & cat>1 & loon71>log(1300), robust cluster (schoolnr)
ivreg2 loon71 (vwo = meanvwoL) gebmnd_rel gr4sted gesl entrtot alloch2 I.socml parHE parLE  if entrtot>=21 & entrtot<=60 & cohort==1983 & cat>1 & loon71>log(1300), robust cluster (schoolnr)
ivreg2 loon71 (vwo = meanvwoL) gebmnd_rel gr4sted gesl entrtot alloch2 I.socml parHE parLE  if entrtot>=20 & entrtot<=53 & cohort==1989 & cat>1 & loon71>log(1300), robust cluster (schoolnr)

//Alternative spec A2
ivreg2 opljaren (lbo = meanlboLL) gebmnd_rel gr4sted gesl entrtot alloch2 I.socml parHE parLE  if entrtot>=10 & entrtot<=60 & cohort==1977 & cat<3, robust cluster (schoolnr)
ivreg2 opljaren (lbo = meanlboLL) gebmnd_rel gr4sted gesl entrtot alloch2 I.socml parHE parLE  if entrtot>=20 & entrtot<=50 & cohort==1983 & cat<3, robust cluster (schoolnr)
ivreg2 opljaren (lbo = meanlboLL) gebmnd_rel gr4sted gesl entrtot alloch2 I.socml parHE parLE  if entrtot>=5 & entrtot<=40 & cohort==1989 & cat<3, robust cluster (schoolnr)
ivreg2 opljaren (lbo = meanlboLL) gebmnd_rel gr4sted gesl entrtot alloch2 I.socml parHE parLE  if entrtot>=10 & entrtot<=40 & cohort==1993 & cat<3, robust cluster (schoolnr)

ivreg2 opljaren (havo = meanhavoLL) gebmnd_rel gr4sted gesl entrtot alloch2 I.socml parHE parLE  if entrtot>=25 & entrtot<=70 & cohort==1977 & cat>1 & cat<4, robust cluster (schoolnr)
ivreg2 opljaren (havo = meanhavoLL) gebmnd_rel gr4sted gesl entrtot alloch2 I.socml parHE parLE  if entrtot>=26 & entrtot<=60 & cohort==1983 & cat>1 & cat<4, robust cluster (schoolnr)
ivreg2 opljaren (havo = meanhavoLL) gebmnd_rel gr4sted gesl entrtot alloch2 I.socml parHE parLE  if entrtot>=32 & entrtot<=60 & cohort==1989 & cat>1 & cat<4, robust cluster (schoolnr)
ivreg2 opljaren (havo = meanhavoLL) gebmnd_rel gr4sted gesl entrtot alloch2 I.socml parHE parLE  if entrtot>=28 & entrtot<=60 & cohort==1993 & cat>1 & cat<4, robust cluster (schoolnr)

ivreg2 opljaren (vwo = meanvwoLL) gebmnd_rel gr4sted gesl entrtot alloch2 I.socml parHE parLE  if entrtot>=10 & entrtot<=70 & cohort==1977 & cat>2, robust cluster (schoolnr)
ivreg2 opljaren (vwo = meanvwoLL) gebmnd_rel gr4sted gesl entrtot alloch2 I.socml parHE parLE  if entrtot>=10 & entrtot<=60 & cohort==1983 & cat>2, robust cluster (schoolnr)
ivreg2 opljaren (vwo = meanvwoLL) gebmnd_rel gr4sted gesl entrtot alloch2 I.socml parHE parLE  if entrtot>=30 & entrtot<=60 & cohort==1989 & cat>2, robust cluster (schoolnr)
ivreg2 opljaren (vwo = meanvwo) gebmnd_rel gr4sted gesl entrtot alloch2 I.socml parHE parLE  if entrtot>=20 & entrtot<=60 & cohort==1993, robust cluster (schoolnr)


ivreg2 loon71 (lbo = meanlboLL) gebmnd_rel gr4sted gesl entrtot alloch2 I.socml parHE parLE  if entrtot>=26 & entrtot<=60 & cohort==1977 & cat<3 & loon71>log(1300), robust cluster (schoolnr)
ivreg2 loon71 (lbo = meanlboLL) gebmnd_rel gr4sted gesl entrtot alloch2 I.socml parHE parLE  if entrtot>=20 & entrtot<=50 & cohort==1983 & cat<3 & loon71>log(1300), robust cluster (schoolnr)
ivreg2 loon71 (lbo = meanlboLL) gebmnd_rel gr4sted gesl entrtot alloch2 I.socml parHE parLE  if entrtot>=5 & entrtot<=40 & cohort==1989 & cat<3 & loon71>log(1300), robust cluster (schoolnr)

ivreg2 loon71 (havo = meanhavoLL) gebmnd_rel gr4sted gesl entrtot alloch2 I.socml parHE parLE  if entrtot>=25 & entrtot<=70 & cohort==1977 & cat>1 & cat<4 & loon71>log(1300), robust cluster (schoolnr)
ivreg2 loon71 (havo = meanhavoLL) gebmnd_rel gr4sted gesl entrtot alloch2 I.socml parHE parLE  if entrtot>=25 & entrtot<=60 & cohort==1983 & cat>1 & cat<4 & loon71>log(1300), robust cluster (schoolnr)
ivreg2 loon71 (havo = meanhavoLL) gebmnd_rel gr4sted gesl entrtot alloch2 I.socml parHE parLE  if entrtot>=20 & entrtot<=60 & cohort==1989 & cat>1 & cat<4 & loon71>log(1300), robust cluster (schoolnr)

ivreg2 loon71 (vwo = meanvwoLL) gebmnd_rel gr4sted gesl entrtot alloch2 I.socml parHE parLE  if entrtot>=10 & entrtot<=65 & cohort==1977 & cat>2 & loon71>log(1300), robust cluster (schoolnr)
ivreg2 loon71 (vwo = meanvwoLL) gebmnd_rel gr4sted gesl entrtot alloch2 I.socml parHE parLE  if entrtot>=10 & entrtot<=55 & cohort==1983 & cat>2 & loon71>log(1300), robust cluster (schoolnr)
ivreg2 loon71 (vwo = meanvwoLL) gebmnd_rel gr4sted gesl entrtot alloch2 I.socml parHE parLE  if entrtot>=10 & entrtot<=53 & cohort==1989 & cat>2 & loon71>log(1300), robust cluster (schoolnr)

////////////////////////
//FIGURES 
//S1 FIG
graph bar (mean) ocat1 (mean) ocat2 (mean) ocat3 (mean) ocat4 (mean) ocat5 (mean) ocat6, over(cat) by(cohort) bar(1, color(black)) bar(2, color(gs3)) bar(3, color(gs6)) bar(4, color(gs9)) bar(5, color(gs12)) bar(6, color(gs15)) graphregion(color(white)) legend(order(1 "Primary" 2 "Lower secondary" 3 "Higher secondary" 4 "Vocational PS" 5 "Higher prof." 6 "University") cols(3))

//S2 FIG
//SEE ANALYSIS ON 1999 VOCL COHORT DATA FURTHER ON

//S3 FIG
twoway (scatter meanyosECC entrtot if cat==1 & entrtot>15 & cohort==1977)(lfit meanyosECC entrtot if cat==1 & entrtot>15 & cohort==1977)(scatter meanyosECC entrtot  if cat==2 & entrtot>15 & cohort==1977)(lfit meanyosECC entrtot  if cat==2 & entrtot>15 & cohort==1977)(scatter meanyosECC entrtot if cat==3 & entrtot>15 & cohort==1977)(lfit meanyosECC entrtot if cat==3 & entrtot>15 & cohort==1977)(scatter meanyosECC entrtot if cat==4 & entrtot>15 & cohort==1977)(lfit meanyosECC entrtot if cat==4 & entrtot>15 & cohort==1977)
twoway (scatter meanloonECC entrtot if cat==1 & entrtot>15 & cohort==1977)(lfit meanloonECC entrtot if cat==1 & entrtot>15 & cohort==1977)(scatter meanloonECC entrtot  if cat==2 & entrtot>15 & cohort==1977)(lfit meanloonECC entrtot  if cat==2 & entrtot>15 & cohort==1977)(scatter meanloonECC entrtot if cat==3 & entrtot>15 & cohort==1977)(lfit meanloonECC entrtot if cat==3 & entrtot>15 & cohort==1977)(scatter meanloonECC entrtot if cat==4 & entrtot>15 & cohort==1977)(lfit meanloonECC entrtot if cat==4 & entrtot>15 & cohort==1977)

//S4-S7 FIG
binscatter oplmax entrtot if entrtot>15 & cohort==1977, discrete name(X1A) xtitle("Entrance Test score", size(small)) ytitle("Parental education", size(small)) graphregion(color(white)) xlabel(,labsize(small)) ylabel(,labsize(small))
binscatter oplmax entrtot if entrtot>15 & cohort==1983, discrete name(X1B) xtitle("Entrance Test score", size(small)) ytitle("Parental education", size(small)) graphregion(color(white)) xlabel(,labsize(small)) ylabel(,labsize(small))
binscatter oplmax entrtot if entrtot>15 & cohort==1989, discrete name(X1C) xtitle("Entrance Test score", size(small)) ytitle("Parental education", size(small)) graphregion(color(white)) xlabel(,labsize(small)) ylabel(,labsize(small))
binscatter oplmax entrtot if entrtot>15 & cohort==1993, discrete name(X1D) xtitle("Entrance Test score", size(small)) ytitle("Parental education", size(small)) graphregion(color(white)) xlabel(,labsize(small)) ylabel(,labsize(small))

binscatter socml_rank entrtot if entrtot>15 & cohort==1977, discrete name(X2A) xtitle("Entrance Test score", size(small)) ytitle("Parental occupation", size(small)) graphregion(color(white)) xlabel(,labsize(small)) ylabel(,labsize(small))
binscatter socml_rank entrtot if entrtot>15 & cohort==1983, discrete name(X2B) xtitle("Entrance Test score", size(small)) ytitle("Parental occupation", size(small)) graphregion(color(white)) xlabel(,labsize(small)) ylabel(,labsize(small)) 
binscatter socml_rank entrtot if entrtot>15 & cohort==1989, discrete name(X2C) xtitle("Entrance Test score", size(small)) ytitle("Parental occupation", size(small)) graphregion(color(white)) xlabel(,labsize(small)) ylabel(,labsize(small))
binscatter socml_rank entrtot if entrtot>15 & cohort==1993, discrete name(X2D) xtitle("Entrance Test score", size(small)) ytitle("Parental occupation", size(small)) graphregion(color(white)) xlabel(,labsize(small)) ylabel(,labsize(small))

binscatter gesl entrtot if entrtot>15 & cohort==1977, discrete name(X3A) xtitle("Entrance Test score", size(small)) ytitle("Gender", size(small)) graphregion(color(white)) xlabel(,labsize(small)) ylabel(,labsize(small))
binscatter gesl entrtot if entrtot>15 & cohort==1983, discrete name(X3B) xtitle("Entrance Test score", size(small)) ytitle("Gender", size(small)) graphregion(color(white)) xlabel(,labsize(small)) ylabel(,labsize(small))
binscatter gesl entrtot if entrtot>15 & cohort==1989, discrete name(X3C) xtitle("Entrance Test score", size(small)) ytitle("Gender", size(small)) graphregion(color(white)) xlabel(,labsize(small)) ylabel(,labsize(small))
binscatter gesl entrtot if entrtot>15 & cohort==1993, discrete name(X3D) xtitle("Entrance Test score", size(small)) ytitle("Gender", size(small)) graphregion(color(white)) xlabel(,labsize(small)) ylabel(,labsize(small))

binscatter alloch entrtot if entrtot>15 & cohort==1977, discrete name(X4A) xtitle("Entrance Test score", size(small)) ytitle("Non-dutch", size(small)) graphregion(color(white)) xlabel(,labsize(small)) ylabel(,labsize(small))
binscatter alloch entrtot if entrtot>15 & cohort==1983, discrete name(X4B) xtitle("Entrance Test score", size(small)) ytitle("Non-dutch", size(small)) graphregion(color(white)) xlabel(,labsize(small)) ylabel(,labsize(small))
binscatter alloch entrtot if entrtot>15 & cohort==1989, discrete name(X4C) xtitle("Entrance Test score", size(small)) ytitle("Non-dutch", size(small)) graphregion(color(white)) xlabel(,labsize(small)) ylabel(,labsize(small))
binscatter alloch entrtot if entrtot>15 & cohort==1993, discrete name(X4D) xtitle("Entrance Test score", size(small)) ytitle("Non-dutch", size(small)) graphregion(color(white)) xlabel(,labsize(small)) ylabel(,labsize(small))

binscatter gr4sted entrtot if entrtot>15 & cohort==1977, discrete name(X5A) xtitle("Entrance Test score", size(small)) ytitle("Urbanisation", size(small)) graphregion(color(white)) xlabel(,labsize(small)) ylabel(,labsize(small))
binscatter gr4sted entrtot if entrtot>15 & cohort==1983, discrete name(X5B) xtitle("Entrance Test score", size(small)) ytitle("Urbanisation", size(small)) graphregion(color(white)) xlabel(,labsize(small)) ylabel(,labsize(small))
binscatter gr4sted entrtot if entrtot>15 & cohort==1989, discrete name(X5C) xtitle("Entrance Test score", size(small)) ytitle("Urbanisation", size(small)) graphregion(color(white)) xlabel(,labsize(small)) ylabel(,labsize(small))
binscatter gr4sted entrtot if entrtot>15 & cohort==1993, discrete name(X5D) xtitle("Entrance Test score", size(small)) ytitle("Urbanisation", size(small)) graphregion(color(white)) xlabel(,labsize(small)) ylabel(,labsize(small))

binscatter gebmnd_rel entrtot if entrtot>15 & cohort==1977, discrete name(X6A) xtitle("Entrance Test score", size(small)) ytitle("Month of birth", size(small)) graphregion(color(white)) xlabel(,labsize(small)) ylabel(,labsize(small))
binscatter gebmnd_rel entrtot if entrtot>15 & cohort==1983, discrete name(X6B) xtitle("Entrance Test score", size(small)) ytitle("Month of birth", size(small)) graphregion(color(white)) xlabel(,labsize(small)) ylabel(,labsize(small))
binscatter gebmnd_rel entrtot if entrtot>15 & cohort==1989, discrete name(X6C) xtitle("Entrance Test score", size(small)) ytitle("Month of birth", size(small)) graphregion(color(white)) xlabel(,labsize(small)) ylabel(,labsize(small))
binscatter gebmnd_rel entrtot if entrtot>15 & cohort==1993, discrete name(X6D) xtitle("Entrance Test score", size(small)) ytitle("Month of birth", size(small)) graphregion(color(white)) xlabel(,labsize(small)) ylabel(,labsize(small))

//S4 FIG
graph combine X1A X2A X3A X4A X5A X6A, col(2) graphregion(color(white))
//S5 FIG
graph combine X1B X2B X3B X4B X5B X6B, col(2) graphregion(color(white))
//S6 FIG
graph combine X1C X2C X3C X4C X5C X6C, col(2) graphregion(color(white))
//S7 FIG
graph combine X1D X2D X3D X4D X5D X6D, col(2) graphregion(color(white))


//S8 FIG

twoway (line meanlbo entrtot if cohort==1977, lpattern(solid) lcolor(black))(line meanmavo entrtot if cohort==1977, lpattern(dash) lcolor(black))(line meanhavo entrtot if cohort==1977, lpattern(vshortdash) lcolor(black))(line meanvwo entrtot if cohort==1977, lpattern("_--") lcolor(black)), name(X1A) xtitle("Entrance Test score", size(small)) ytitle("Student share", size(small)) graphregion(color(white)) xlabel(10(10)70,labsize(small)) ylabel(,labsize(small)) legend(order(1 "Track 1" 2 "Track 2" 3 "Track 3" 4 "Track 4") cols(4) size(small))
twoway (line meanlbo entrtot if cohort==1983, lpattern(solid) lcolor(black))(line meanmavo entrtot if cohort==1983, lpattern(dash) lcolor(black))(line meanhavo entrtot if cohort==1983, lpattern(vshortdash) lcolor(black))(line meanvwo entrtot if cohort==1983, lpattern("_--") lcolor(black)), name(X1B) xtitle("Entrance Test score", size(small)) ytitle("Student share", size(small)) graphregion(color(white)) xlabel(10(10)60,labsize(small)) ylabel(,labsize(small)) legend(order(1 "Track 1" 2 "Track 2" 3 "Track 3" 4 "Track 4") cols(4) size(small))
twoway (line meanlbo entrtot if cohort==1989, lpattern(solid) lcolor(black))(line meanmavo entrtot if cohort==1989, lpattern(dash) lcolor(black))(line meanhavo entrtot if cohort==1989, lpattern(vshortdash) lcolor(black))(line meanvwo entrtot if cohort==1989, lpattern("_--") lcolor(black)), name(X1C) xtitle("Entrance Test score", size(small)) ytitle("Student share", size(small)) graphregion(color(white)) xlabel(10(10)60,labsize(small)) ylabel(,labsize(small)) legend(order(1 "Track 1" 2 "Track 2" 3 "Track 3" 4 "Track 4") cols(4) size(small))
twoway (line meanlbo entrtot if cohort==1993, lpattern(solid) lcolor(black))(line meanmavo entrtot if cohort==1993, lpattern(dash) lcolor(black))(line meanhavo entrtot if cohort==1993, lpattern(vshortdash) lcolor(black))(line meanvwo entrtot if cohort==1993, lpattern("_--") lcolor(black)), name(X1D) xtitle("Entrance Test score", size(small)) ytitle("Student share", size(small)) graphregion(color(white)) xlabel(10(10)60,labsize(small)) ylabel(,labsize(small)) legend(order(1 "Track 1" 2 "Track 2" 3 "Track 3" 4 "Track 4") cols(4) size(small))

grc1leg X1A X1B X1C X1D, col(2) graphregion(color(white))

//S9 FIG
kdensity entrtot if cohort==1977, graphregion(color(white)) name(AF9a)
kdensity entrtot if cohort==1983, graphregion(color(white)) name(AF9b)
kdensity entrtot if cohort==1989, graphregion(color(white)) name(AF9c)
kdensity entrtot if cohort==1993, graphregion(color(white)) name(AF9d)

grc1leg AF9a AF9b AF9c AF9d, col(2) graphregion(color(white))

******************************************************************
**PART 4: Coding and regression analysis for the additional VOCL 1999 file (school achievement results
******************************************************************

use "VOCL1999.dta", clear

//code tracks
gen vmbo =0 
replace vmbo =1 if kltyp3<6
replace vmbo =1 if kltyp3==97
gen havo =0
replace havo =1 if kltyp3==7
gen vwo =0 
replace vwo =1 if kltyp3==9

//drop irregular tracks
drop if kltyp3 ==.
drop if kltyp3==8
drop if kltyp3==96
drop if kltyp3==98
drop if kltyp3==99

egen ndl_std = std(ngoed_nd)
egen wis_std = std(ngoeda_wk)
egen av_std = std(av_ngoed)

replace rcito=. if rcito>550
drop if rcito==.
drop if entrtot==.
drop if entrtot==0
drop if advies==.
drop if sekse==98

//categorical track variable
gen cat = 1 if vmbo==1
replace cat = 2 if havo ==1
replace cat = 3 if vwo ==1

//some strange x.00001 values in the data
replace entrtot = int(entrtot)

//code gender
replace sekse =99 if sekse==9
gen d_sekse = sekse==99
//code parental education
replace hoopl2 =6 if hoopl2==7
replace hoopl2 =99 if hoopl2==9
gen d_hoopl = hoopl==99
//code household size
gen nrkids = kindtal
replace nrkids=99 if nrkids==9
gen d_kids  = nrkids==99
//code family structure
gen fam_str = ov61
replace fam_str=99 if fam_str>5
gen d_fam = fam_str==99
//code language at home
gen taal=ld04_a
replace taal=2 if taal>3 & taal<9
replace taal=99 if taal==9|taal==.
gen d_taal = taal==99

//set missing codes to missing
replace advies=. if advies==0
replace ctaal =. if ctaal>20
replace crek =. if crek>20
replace cinfor =. if cinfor>20

//standardize test scores
egen entrtot_std = std(entrtot)
egen cito_std = std(rcito)

//generate instruments
bys entrtot: egen meanvwo = mean(vwo)
bys entrtot: egen meanvmbo = mean(vmbo)
bys rcito: egen cmeanvwo = mean(vwo)
bys rcito: egen cmeanvmbo = mean(vmbo)

//RDD dummy instruments for cito (for analysis in S4 table)
gen elig_vwoC=rcito>=545
gen elig_vmboC=rcito<=538

//ANALYSIS
//TABLE 4: 1999 results
//ENTRANCE TEST
ivreg2 ndl_std (vmbo = meanvmbo) entrtot sekse hoopl2 nrkids I.fam_str I.taal d_sekse d_hoopl d_kids d_fam d_taal if entrtot>=10 & entrtot<=60, robust
ivreg2 wis_std (vmbo = meanvmbo) entrtot sekse hoopl2 nrkids I.fam_str I.taal d_sekse d_hoopl d_kids d_fam d_taal if entrtot>=18 & entrtot<=60, robust
ivreg2 av_std (vmbo = meanvmbo) entrtot sekse hoopl2 nrkids I.fam_str I.taal d_sekse d_hoopl d_kids d_fam d_taal if entrtot>=15 & entrtot<=60, robust

ivreg2 ndl_std (vwo = meanvwo) entrtot sekse_c hoopl2 nrkids I.fam_str I.taal d_sekse d_hoopl d_kids d_fam d_taal if entrtot>=20 & entrtot<=60, robust
ivreg2 wis_std (vwo = meanvwo) entrtot sekse hoopl2 nrkids I.fam_str I.taal d_sekse d_hoopl d_kids d_fam d_taal if entrtot>=30 & entrtot<=51, robust
ivreg2 av_std (vwo = meanvwo) entrtot sekse hoopl2 nrkids I.fam_str I.taal d_sekse d_hoopl d_kids d_fam d_taal if entrtot>=30 & entrtot<=60, robust

//CITO TEST
ivreg2 ndl_std (vmbo = cmeanvmbo) rcito sekse hoopl2 nrkids I.fam_str I.taal d_sekse d_hoopl d_kids d_fam d_taal if rcito>=515 & rcito<=542, robust
ivreg2 wis_std (vmbo = cmeanvmbo) rcito sekse hoopl2 nrkids I.fam_str I.taal d_sekse d_hoopl d_kids d_fam d_taal if rcito>=510 & rcito<=539, robust
ivreg2 av_std (vmbo = cmeanvmbo) rcito sekse hoopl2 nrkids I.fam_str I.taal d_sekse d_hoopl d_kids d_fam d_taal if rcito>=520 & rcito<=550, robust

ivreg2 ndl_std (vwo = cmeanvwo) rcito sekse hoopl2 nrkids I.fam_str I.taal d_sekse d_hoopl d_kids d_fam d_taal if rcito>=510 & rcito<=547 & cat>1, robust
ivreg2 wis_std (vwo = cmeanvwo) rcito sekse hoopl2 nrkids I.fam_str I.taal d_sekse d_hoopl d_kids d_fam d_taal if rcito>=534 & rcito<=548, robust
ivreg2 av_std (vwo = cmeanvwo) rcito sekse hoopl2 nrkids I.fam_str I.taal d_sekse d_hoopl d_kids d_fam d_taal if rcito>=520 & rcito<=550, robust

//S4 TABLE
ivreg2 ndl_std (vmbo = elig_vmboC) rcito sekse hoopl2 nrkids I.fam_str I.taal d_sekse d_hoopl d_kids d_fam d_taal if rcito>=515 & rcito<=542, robust
ivreg2 wis_std (vmbo = elig_vmboC) rcito sekse hoopl2 nrkids I.fam_str I.taal d_sekse d_hoopl d_kids d_fam d_taal if rcito>=510 & rcito<=539, robust
ivreg2 av_std (vmbo = elig_vmboC) rcito sekse hoopl2 nrkids I.fam_str I.taal d_sekse d_hoopl d_kids d_fam d_taal if rcito>=520 & rcito<=550, robust

ivreg2 ndl_std (vwo = elig_vwoC) rcito sekse hoopl2 nrkids I.fam_str I.taal d_sekse d_hoopl d_kids d_fam d_taal if rcito>=510 & rcito<=547 & cat>1, robust
ivreg2 wis_std (vwo = elig_vwoC) rcito sekse hoopl2 nrkids I.fam_str I.taal d_sekse d_hoopl d_kids d_fam d_taal if rcito>=534 & rcito<=548, robust
ivreg2 av_std (vwo = elig_vwoC) rcito sekse hoopl2 nrkids I.fam_str I.taal d_sekse d_hoopl d_kids d_fam d_taal if rcito>=520 & rcito<=550, robust

//S2 FIGURE
binscatter vmbo entrtot if entrtot>=15, discrete name(vmbo_et) linetype(none)
binscatter vwo entrtot if entrtot>=15, discrete name(vwo_et) linetype(none)
binscatter vmbo rcito if rcito>=515, discrete name(vmbo_cito) linetype(none)
binscatter vwo rcito if rcito>=515, discrete name(vwo_cito) linetype(none)

graph combine vmbo_et vwo_et vmbo_cito vwo_cito, col(2)
